1  
2  
3  
4  
5  
6  
7  
8  
9  
10  
11  
12  
13  
14  
15  
16  
17  
18  
19  
20  
21

**Occurrence and characterization of cyst nematode species (*Globodera* spp.) associated with potato crops in Colombia**

Daniela Vallejo<sup>1</sup>, Diego A. Rojas<sup>2</sup>, John A. Martinez<sup>2</sup>, Sergio Marchant<sup>3</sup>, Claudia M. Holguin<sup>4\*</sup>,  
Olga Y. Pérez<sup>2</sup>

<sup>1</sup> Universidad Nacional de Colombia, Sede Medellín, Colombia

<sup>2</sup> Corporación Colombiana de Investigación Agropecuaria, AGROSAVIA, C.I. Tibaitatá  
Mosquera, Cundinamarca, Colombia

<sup>3</sup> Universidad Industrial de Santander, Bucaramanga, Santander, Colombia

<sup>4</sup> Corporación Colombiana de Investigación Agropecuaria, AGROSAVIA, C.I La Selva,  
Rionegro, Antioquia, Colombia

\*Corresponding author:

E-mail: [cholguin@agrosavia.co](mailto:cholguin@agrosavia.co) (CMH)

## 22 **Abstract**

23 Potato cyst nematodes (PCN) from the genus *Globodera* spp. cause major losses in potato  
24 (*Solanum tuberosum*) industry worldwide. Despite their importance, at present little is known  
25 about the status of this plant pathogen in cultivated potatoes in Colombia. In this study, a total of  
26 589 samples collected from 75 geographic localities from nine potato producing departments of  
27 Colombia were assayed for the presence of potato cyst nematodes. Fifty-seven percent of  
28 samples tested positive for PCN. All populations but one were identified as *Globodera pallida*,  
29 with conspicuous morphometric variation found among populations. Based on phylogenetic  
30 analysis of the internal transcribed spacer region (ITS1-5.8S-ITS2) of the rRNA gene and D2-D3  
31 expansion segments of the 28S rRNA gene, *G. pallida* from Colombia formed a monophyletic  
32 group closely related to Peruvian populations, with the lowest average number of nucleotide  
33 substitutions per site ( $D_{xy}= 0.002$ ) and net nucleotide substitutions per site ( $D_a= 0.001$ ), when  
34 compared to *G. pallida* populations from South, North America and Europe. A single sample  
35 formed a well-supported subclade along with *G. rostochiensis* and *G. tabacum* from Japan, USA  
36 and Argentina. To our knowledge this is the first comprehensive survey of *Globodera*  
37 populations from Colombia that includes morphological and genetic data. Our findings on  
38 species diversity and phylogenetic relationships of *Globodera* populations from Colombia may  
39 help elucidate the status and distribution of *Globodera* species, and lead to the development of  
40 accurate management strategies for the potato cyst nematodes.

## 41 **Introduction**

42           The cyst nematodes, *Globodera* Skarbilovich, 1959, are one of the most limiting plant  
43 parasitic nematodes around the world [1]. Within the genus, thirteen species have been  
44 identified, of which *G. rostochiensis*, *G. pallida*, *G. ellingtonae*, and *G. tabacum* are important  
45 for agriculture [2]. The potato cyst nematodes (PCN), *Globodera rostochiensis* (golden or yellow  
46 potato nematode) and *Globodera pallida* (pale potato nematode) cause major losses in potato  
47 (*Solanum tuberosum* L.) crops [3], and are also considered as official control pests in many  
48 countries [4]. These species cause damage to the potato plants, by penetrating and feeding into  
49 the root tissue, which causes nutritional and water deficiency that is expressed in chlorosis and  
50 wilting of the leaves, and may also cause low growth, dwarfism and proliferation of small lateral  
51 roots that lead to yield reduction [4]. If PCN species are left uncontrolled may reduce potato  
52 yield up to 80% [5,6], representing major economic losses in the potato industry worldwide.

53           Identification of *Globodera* species based on morphological characterization of the  
54 perineal area of cysts (e.g. distance from vulva and anus and Granek's ratio) and some characters  
55 of the second stage juvenile (e.g. stylet length and stylet knob shape) [4,7] may be ambiguous.  
56 Morphometric measurements of these characters often show overlap among species, making  
57 morphological identification of cyst nematodes time consuming and difficult, especially when  
58 differentiating *G. pallida* from *G. rostochiensis* and *G. tabacum* species complex (*G. tabacum*  
59 *tabacum*, *G. tabacum solanacearum* and *G. tabacum virginiae*) [8,9]. Therefore, molecular  
60 diagnosis is a necessary and recommended complement to identify cyst nematode species [4].

61           For plant-parasitic nematodes, molecular diagnostics not only improve speed and  
62 accuracy of nematode identification, but also have allowed a better understanding of the biology  
63 of nematodes as agricultural pests [10]. The genomic regions more often used to study

64 phylogenetic relationships for plant-parasitic nematodes include DNA fragments from the 28S  
65 ribosomal DNA (rDNA), internal transcribed spacer (ITS), as well as mitochondrial DNA  
66 (mtDNA) [2,10–15]. Ribosomal genes exhibit enough conserved inter-specific neutral genetic  
67 variation as to inform species delimitation without being prone to marker saturation [15–18]. For  
68 cyst identification, although several methods have been used, DNA-based approaches have  
69 shown to be more accurate to separate *G. pallida* from *G. rostochiensis* and other *Globodera*  
70 species and, ribosomal regions have also shown to be useful markers to distinguish species  
71 within the genus [12,17,19–21]. For new occurrences of *Globodera* spp., sequencing of DNA  
72 fragments is also recommended, especially for regions where genetic data has not been reported  
73 before and for PCN species that may not follow a typical profile [17,22]. For *Globodera* species  
74 from Colombia, genetic information including validation of currently available diagnostic DNA  
75 markers and molecular phylogenetics have not been documented.

76         In Colombia, *G. pallida* was first identified based on morphological characters in 1970 in  
77 Cumbal, municipality located in the Nariño department, at the south west extreme of the country  
78 [23]. In 1971, the species was regulated under the authority of The Instituto Colombiano  
79 Agropecuario (ICA) and listed as quarantine pest, limiting the access to export potato seeds from  
80 Nariño and its neighbor department, Cauca, to other producing potato departments of Colombia.  
81 In 1983, Nieto [24] conducted an intensive PCN survey and reported *G. pallida* in other  
82 municipalities of Nariño (Túquerres, Pupiales, Ipiales, Gualmatán, Sapuyes, among others), as  
83 well as in Cauca (Totoró, Cajibío, Silvia, Popayán, Páez, among others), with an average of 50-  
84 80 cysts/100 g of soil in Nariño and 9-10 cysts/100 g of soil in Cauca. The authors also sampled  
85 the nematode in Cundinamarca and Boyacá, the main producing potato departments in  
86 Colombia, and other minor producing potato departments such as Caldas, Tolima, Valle del

87 Cauca, Santander and Norte de Santander, but only reported the presence of PCN in Nariño and  
88 Cauca. In 2004, the species was no longer listed as an official control pest. Yet, in a survey  
89 conducted from 2011 to 2012, PCN was reported in 12 out of 14 sampled fields in Tunja,  
90 Samacá and Ventaquemada (municipalities of Boyacá) and Tausa, Tabio and Zipaquirá  
91 (municipalities of Cundinamarca), although population densities were not registered [25].  
92 Therefore, PCN was considered as re-emerging pathogen in 2012 by the Federación Colombiana  
93 de Productores de Papa (Colombian Federation of Potato Producers – FEDEPAPA), and ICA  
94 [25].

95 To obtain better knowledge about *Globodera* spp. associated with potato crops in  
96 Colombia, it is necessary to develop DNA sequence information to better characterize  
97 populations from different geographic regions and to understand their distribution patterns. This  
98 information will also serve as a foundation to the design of effective control measures that  
99 require fast and accurate identification of species, and it is a crucial factor when searching for  
100 possible sources of host-plant resistance as well as for other management strategies. Therefore,  
101 the objectives of this study were to: i) survey the *Globodera* spp. populations detected in  
102 cultivated potatoes in Colombia; ii) carry out a molecular characterization of these *Globodera*  
103 populations based on sequences of the ITS1 of rRNA, partial 18S rRNA and, D2-D3 expansion  
104 segments of the 28S nuclear ribosomal RNA gene; iii) study the phylogenetic relationships of  
105 *Globodera* spp. from Colombia by comparison with previously published molecular data of  
106 populations from other regions of the world; and iv) compare cyst morphometric measurements  
107 among *Globodera* populations from Colombia and other species previously reported.

108

## 109 **Materials and Methods**

## 110 **Ethics statement**

111 Nematode sampling was performed under a collection permit granted by the Autoridad  
112 Nacional de Licencias Ambientales (ANLA) [Colombian National Authority Environmental  
113 Permits]: “Permit for collecting specimens of wild species of the biological diversity for non-  
114 commercial scientific research purposes], resolution No. 1466, expedited on December 3, 2014.  
115

## 116 **Nematode populations and sampling**

117 From 2013 to 2017, an extensive survey was conducted throughout the main commercial  
118 potato producing regions of Colombia. A total of 589 sampling sites were selected in 75  
119 municipalities using a stratified sampling strategy. The strata were defined as the departments  
120 with the highest potato area reported in Colombia [26], for a total of nine departments sampled:  
121 Cundinamarca, Boyacá, Antioquia, Nariño, Santander, Norte de Santander, Tolima, Caldas and  
122 Cauca (Fig 1, Table 1). At each department, the number of fields sampled per municipality was  
123 proportional to the potato area planted and fields at each municipality were selected based on  
124 established potato crops in pre-flowering and flowering stages (Fig 1, Table 1). Soil samples at  
125 each field were collected from within rows, at roughly equal intervals in a line transect pattern  
126 across an area of 10,000 m<sup>2</sup> or less. A soil sample consisted of 60 soil cores (1.5 cm in diameter  
127 by 5 cm deep) taken near the root of the plants. Infected roots and surrounding soil of samples  
128 collected from each field were pooled into one composite sample. Samples were placed into  
129 plastic bags, transported to the laboratory of microbiology at the Corporación Colombiana de  
130 Investigación Agropecuaria (AGROSAVIA), Tibaitatá Research Center, in Mosquera,  
131 Cundinamarca, and stored at 4°C until processing. Cyst nematodes were extracted from soil  
132 samples using the Fenwick method [27], and cyst individuals per 100 cm<sup>3</sup> of soil were counted

133 and morphologically identified using the keys by Golden and Handoo et al. [7,28]. Additionally,  
134 a viability test was performed by randomly selecting 10 cyst per population that were crushed  
135 using a huijsman homogenizer [29] to release eggs and juveniles, alive eggs and j1 were counted  
136 under the stereoscope and viability percentage was calculated per population.

137

138

139 **Fig 1. Map of the Colombian Andes showing sampling sites of PCN associated with potato**  
140 **crops in Colombia.**

141 Black lines represent department limits, blue lines represent rivers and lakes. Colors according  
142 elevation map. Red dots mark the position of the sample sites that tested positive for PCN and  
143 blue dots mark the position of the sampling sites that tested negative for PCN.

144  
145  
146

**Table 1. *Globodera* species and density levels (number of individuals per 100 cm<sup>3</sup> of soil) and prevalence (%) in cultivated potato crops in Colombia.**

| Department   | Municipality | Species           | # of samples collected | # of samples with <i>Globodera</i> spp. | Prevalence | Average/100 cm <sup>3</sup> soil | Population range/100 cm <sup>3</sup> soil | Viability average | Potato Variety |
|--------------|--------------|-------------------|------------------------|-----------------------------------------|------------|----------------------------------|-------------------------------------------|-------------------|----------------|
|              |              |                   |                        |                                         | (%)        |                                  |                                           | (%)               |                |
| Nariño       | Túquerres    | <i>G. pallida</i> | 12                     | 12                                      | 100        | 97,3                             | 1 - 345                                   | 60                | D_Capiro       |
| Nariño       | Ipiales      | <i>G. pallida</i> | 10                     | 5                                       | 50         | 9,1                              | 2 - 45                                    | 41                | D_Capiro       |
| Nariño       | Pasto        | <i>G. pallida</i> | 15                     | 9                                       | 60         | 14,7                             | 1 - 64                                    | 60                | D_Capiro       |
| Nariño       | Yacuanquer   | <i>G. pallida</i> | 2                      | 2                                       | 100        | 3,5                              | 3 - 4                                     | 45                | Criolla        |
| Nariño       | Tangua       | <i>G. pallida</i> | 5                      | 4                                       | 80         | 11                               | 1 - 34                                    | 55                | D_Capiro       |
| Nariño       | Ospina       | <i>G. pallida</i> | 5                      | 4                                       | 80         | 47,4                             | 5 - 93                                    | 38                | D_Capiro       |
| Nariño       | Iles         | <i>G. pallida</i> | 5                      | 1                                       | 20         | 16                               | 1 - 80                                    | 59                | D_Capiro       |
| Nariño       | Guachucal    | <i>G. pallida</i> | 7                      | 7                                       | 100        | 21,3                             | 1 - 84                                    | 63                | Betina         |
| Nariño       | Pupiales     | <i>G. pallida</i> | 11                     | 6                                       | 54,5       | 5,9                              | 1 - 29                                    | 30                | D_Capiro       |
| Nariño       | Córdoba      | <i>G. pallida</i> | 7                      | 7                                       | 100        | 9,4                              | 1 -27                                     | 44                | P Suprema      |
| Cundinamarca | Chipaque     | <i>G. pallida</i> | 4                      | 4                                       | 100        | 68,3                             | 2-168                                     | 51                | P Suprema      |
| Cundinamarca | Madrid       | <i>G. pallida</i> | 5                      | 2                                       | 40         | 1,8                              | 2 - 7                                     | 63                | D_Capiro       |
| Cundinamarca | Pasca        | -                 | 6                      | 0                                       | 0          | 0                                | 0                                         | 0                 | P Suprema      |
| Cundinamarca | Sesquilé     | <i>G. pallida</i> | 9                      | 5                                       | 55,6       | 10,2                             | 1 - 25                                    | 62                | P Suprema      |
| Cundinamarca | Subachoque   | <i>G. pallida</i> | 5                      | 1                                       | 20         | 4                                | 0 - 20                                    | 52                | P Suprema      |
| Cundinamarca | Tausa        | <i>G. pallida</i> | 25                     | 17                                      | 68         | 84,2                             | 1 - 1327                                  | 51                | P Suprema      |
| Cundinamarca | Ubaque       | <i>G. pallida</i> | 4                      | 2                                       | 50         | 1,8                              | 3 - 4                                     | 58                | P Superior     |
| Cundinamarca | Ubaté        | <i>G. pallida</i> | 3                      | 3                                       | 100        | 443,3                            | 268 - 556                                 | 51                | P_Pastusa      |
| Cundinamarca | Une          | <i>G. pallida</i> | 3                      | 3                                       | 100        | 3,3                              | 1 - 5                                     | 72                | Criolla        |
| Cundinamarca | Villapinzón  | <i>G. pallida</i> | 29                     | 18                                      | 62,1       | 23,4                             | 1 - 475                                   | 74                | P Suprema      |
| Cundinamarca | Zipacquirá   | <i>G. pallida</i> | 9                      | 5                                       | 55,6       | 2                                | 2 - 10                                    | 64                | P Suprema      |
| Cundinamarca | Cajicá       | <i>G. pallida</i> | 1                      | 1                                       | 100        | 1                                | 0 - 1                                     | 80                | D_Capiro       |
| Cundinamarca | Tenjo        | <i>G. pallida</i> | 2                      | 2                                       | 100        | 72,5                             | 50-95                                     | 76                | D_Capiro       |
| Cundinamarca | Sibaté       | -                 | 8                      | 0                                       | 0          | 0                                | 0                                         | 0                 | Criolla        |



|              |              |                   |    |    |      |       |           |    |           |
|--------------|--------------|-------------------|----|----|------|-------|-----------|----|-----------|
| Cundinamarca | Soacha       | <i>G. pallida</i> | 3  | 3  | 100  | 1     | 0 - 1     | 76 | D_Capiro  |
| Cundinamarca | Cogua        | <i>G. pallida</i> | 4  | 4  | 100  | 1,5   | 1 - 2     | 73 | Betina    |
| Cundinamarca | San Bernardo | <i>G. pallida</i> | 2  | 2  | 100  | 2,5   | 2 - 3     | 51 | Criolla   |
| Cundinamarca | Fosca        | <i>G. pallida</i> | 4  | 2  | 50   | 2     | 0 - 5     | 69 | P Suprema |
| Cundinamarca | Lenguazaque  | <i>G. pallida</i> | 3  | 1  | 33,3 | 1,7   | 0         | 60 | P_Pastusa |
| Cundinamarca | Simijaca     | -                 | 2  | 0  | 0    | 0     | 0 - 40    | 0  | P Suprema |
| Cundinamarca | Susa         | <i>G. pallida</i> | 15 | 1  | 6,7  | 2,7   | 1 - 125   | 55 | P Suprema |
| Cundinamarca | Guatavita    | <i>G. pallida</i> | 11 | 4  | 36,4 | 11,8  | 1 - 125   | 55 | P Suprema |
| Cundinamarca | La Calera    | -                 | 5  | 0  | 0    | 0     | 0         | 0  | P Suprema |
| Cundinamarca | Choconta     | <i>G. sp.</i>     | 8  | 7  | 87,5 | 43    | 1 - 93    | 70 | P Suprema |
| Boyacá       | Tota         | <i>G. pallida</i> | 6  | 4  | 66,7 | 4,7   | 2 - 19    | 58 | P_Pastusa |
| Boyacá       | Toca         | <i>G. pallida</i> | 10 | 7  | 70   | 27,3  | 5 - 122   | 51 | Tocarreña |
| Boyaca       | Tunja        | <i>G. pallida</i> | 25 | 17 | 68   | 47,3  | 1 - 411   | 60 | D_Capiro  |
| Boyaca       | Chíquiza     | <i>G. pallida</i> | 11 | 9  | 81,8 | 47    | 1 - 142   | 23 | Betina    |
| Boyaca       | Úmbita       | <i>G. pallida</i> | 5  | 1  | 20   | 2     | 0 - 2     | 20 | Tocarreña |
| Boyaca       | Samacá       | <i>G. pallida</i> | 29 | 22 | 75,9 | 53,2  | 1 - 429   | 24 | D_Capiro  |
| Boyaca       | Oicatá       | <i>G. pallida</i> | 6  | 4  | 66,7 | 7,7   | 1 - 36    | 24 | D_Capiro  |
| Boyaca       | Sogamoso     | <i>G. pallida</i> | 8  | 8  | 100  | 107,5 | 1 - 305   | 38 | P_Pastusa |
| Boyaca       | Siachoque    | <i>G. pallida</i> | 27 | 20 | 74,1 | 64    | 1 - 364   | 54 | P_Pastusa |
| Boyaca       | Arcabuco     | <i>G. pallida</i> | 10 | 5  | 50   | 122,5 | 1 - 873   | 23 | P_Pastusa |
| Boyaca       | Ventaquemada | <i>G. pallida</i> | 15 | 12 | 80   | 7,9   | 1 - 73    | 53 | P Suprema |
| Boyaca       | Motavita     | <i>G. pallida</i> | 8  | 4  | 50   | 2,6   | 1 - 14    | 54 | Betina    |
| Boyaca       | Sora         | <i>G. pallida</i> | 3  | 3  | 100  | 185   | 101 - 286 | 60 | D_Capiro  |
| Boyaca       | Saboyá       | <i>G. pallida</i> | 16 | 5  | 31,3 | 1,4   | 1 - 15    | 36 | P_Pastusa |
| Boyaca       | Soracá       | <i>G. pallida</i> | 9  | 8  | 88,9 | 84,7  | 1 - 306   | 24 | D_Capiro  |
| Boyaca       | Boyacá       | <i>G. pallida</i> | 3  | 1  | 33,3 | 13,7  | 1 - 41    | 35 | D_Capiro  |
| Boyaca       | Viracachá    | <i>G. pallida</i> | 3  | 2  | 66,7 | 1,3   | 1 - 2     | 32 | Rubí      |
| Boyaca       | Ciénega      | -                 | 4  | 0  | 0    | 0     | 0         | 0  | P Suprema |
| Boyaca       | Mongua       | <i>G. pallida</i> | 2  | 1  | 50   | 0,5   | 0 - 1     | 38 | ICA_Única |
| Boyaca       | Firavitoba   | <i>G. pallida</i> | 3  | 2  | 66,7 | 1     | 1 - 2     | 44 | P_Pastusa |

|                    |               |                   |    |   |      |       |         |    |            |
|--------------------|---------------|-------------------|----|---|------|-------|---------|----|------------|
| Boyaca             | Gámeza        | <i>G. pallida</i> | 5  | 2 | 40   | 0,8   | 1 - 2   | 20 | Tocarreña  |
| Boyaca             | Belén         | <i>G. pallida</i> | 11 | 7 | 63,6 | 122,3 | 1 - 757 | 40 | P_Pastusa  |
| Boyaca             | Tutazá        | <i>G. pallida</i> | 12 | 3 | 25   | 6,9   | 1 - 78  | 49 | ICA_Única  |
| Cauca              | San Sebastián | <i>G. pallida</i> | 8  | 5 | 62,5 | 4,1   | 1 - 13  | 48 | P_Pastusa  |
| Cauca              | Silvia        | <i>G. pallida</i> | 6  | 2 | 33,3 | 0,3   | 0 - 1   | 47 | Criolla    |
| Cauca              | Totoró        | <i>G. pallida</i> | 6  | 2 | 33,3 | 4,3   | 1 - 23  | 51 | Criolla    |
| Antioquia          | San Vicente   | <i>G. pallida</i> | 9  | 5 | 55,6 | 7,11  | 2 - 24  | 40 | Criolla    |
| Antioquia          | La Unión      | <i>G. pallida</i> | 9  | 3 | 33,3 | 6     | 1 - 51  | 32 | D_Capiro   |
| Antioquia          | Sonsón        | <i>G. pallida</i> | 9  | 5 | 55,6 | 7,5   | 1 - 29  | 16 | Criolla    |
| Antioquia          | La Ceja       | <i>G. pallida</i> | 1  | 1 | 100  | 7     |         | 20 |            |
| Antioquia          | Abejorral     | <i>G. pallida</i> | 6  | 3 | 50   | 2,17  | 1 - 7   | 15 | Criolla    |
| Antioquia          | Marinilla     | <i>G. pallida</i> | 7  | 5 | 71,4 | 5,71  | 1 - 26  | 20 | Criolla    |
| Antioquia          | Santuario     | <i>G. pallida</i> | 3  | 2 | 66,7 | 1,33  | 1 - 3   | 20 | ICA_Nevada |
| Norte de Santander | Pamplona      | <i>G. pallida</i> | 8  | 2 | 25   | 0,9   | 1 - 4   | 37 | Criolla    |
| Norte de Santander | Cácota        | <i>G. pallida</i> | 4  | 2 | 50   | 1     | 1 - 2   | 16 | Criolla    |
| Santander          | Concepción    | <i>G. pallida</i> | 8  | 2 | 25   | 0,9   | 1 - 6   | 20 | P_Pastusa  |
| Santander          | Carcasí       | <i>G. pallida</i> | 2  | 1 | 50   | 0,5   | 0 - 1   | 36 | P_Pastusa  |
| Santander          | Cerrito       | <i>G. pallida</i> | 4  | 1 | 25   | 1     | 1 - 4   | 31 | ICA_Única  |
| Caldas             | Manizales     | <i>G. pallida</i> | 7  | 1 | 14,3 | 0,43  | 1 - 3   | 15 | P_Pastusa  |
| Tolima             | Anzoátegui    | <i>G. pallida</i> | 5  | 1 | 20   | 0,4   | 1 - 2   | 29 | P_Suprema  |
| Tolima             | Murillo       | <i>G. pallida</i> | 7  | 1 | 14,3 | 0,2   | 0 - 1   | 19 | P_Pastusa  |

## 148 **DNA extraction, Polymerase Chain Reaction and sequencing**

149 For molecular characterization, from the departments that showed the highest cyst  
150 nematode densities, soil samples taken per municipality were pooled according to proximity  
151 distance (1 km and 5 km range), resulting in one to two samples per municipality, for a total of  
152 26 populations analyzed (Table 1). From each pooled population, DNA was extracted from  
153 individual cysts or juveniles using the "Sigma Extract-N-Amp Kit (XNAT2)" kit (Sigma, St.  
154 Louis, MO) according to the protocol reported by Ma et al. (2011) at AGROSAVIA, La Selva  
155 Research Center, Rionegro, Antioquia. The number of individuals analyzed per population  
156 depended upon the cyst nematode density present in each soil sample. DNA was then stored at -  
157 20°C until used.

158 PCR amplification of two genomic regions were performed using 12.5 µl of the Extract-  
159 N-Amp™ Tissue PCR kit (Sigma), 1 µl of each primer, 4 µl of DNA and water to complete a  
160 volume of 25 µl. The rDNA primers used for PCR and DNA sequencing are listed in Table 2.  
161 The ITS region of ribosomal DNA was amplified using 94° C for 2.5 min for initial denaturation,  
162 followed by 40 cycles at 94° C for 1 min, 55° C for 1 min, 72° C for 2 min, and a final extension  
163 of 72° C for 5 minutes. For the 28S region, initial denaturation was 94° C for 5 min, 40 cycles of  
164 94° C for 30 sec, 58° C for 30 sec, 72° C for 1 min, and a final extension of 72° C for 10 min  
165 (Nunn, 1992). The products were loaded on a 1.5% agarose gel and visualized using gel red  
166 (Biotium, San Francisco, CA). Sanger sequencing of the amplicons was performed in both  
167 directions by CorpoGen (Bogotá, Colombia).

168

169 **Table 2. Primers used for polymerase chain reaction and DNA sequencing of *Globodera***  
170 **spp. individuals recovered from cultivated potatoes in Colombia.**  
171

| Primer | Marker | Sequence (5' to 3')     | Reference |
|--------|--------|-------------------------|-----------|
| F194   | ITS    | CGTAACAAGGTAGCTGTAG     | [30]      |
| F195   | ITS    | TCCTCCGCTAAATGATATG     | [31]      |
| D2A    | 28S    | ACAAGTACCGTGAGGGAAAGTTG | [31]      |
| D3B    | 28S    | TCGGAAGGAACCAGCTACTA    | [32]      |

172 28S= Large ribosomal RNA subunit and ITS= internal transcribed spacer 1 and 2 including 5.8S rRNA

173

## 174 **Sequence alignment and Phylogenetic analyses**

175 Resulting sequences were assembled in Sequencher® software version 5.1 (Gene Codes  
176 Corporation, Ann Arbor, MI USA) and manually reviewed for base calling errors. Partial 28S  
177 rRNA and ITS1-2 + 5.8S rRNA gene sequences from *G. pallida*, *G. mexicana*, *G. rostochiensis*,  
178 *G. tabacum*, *G. ellingtonae*, and *G. artemisiae*, were retrieved from GenBank nucleotide  
179 database and included in the alignment (Table 3) [8,19,21,33–42]. Sequences of *Punctodera*  
180 *punctata* and *P. chalcoensis* also obtained from GenBank (AF274416.1, DQ328699.1.1,  
181 AY090885. 1), were used as outgroup taxa for both gene regions. After that, sequence  
182 alignments were performed using Clustal W [43] and manually edited using Gene Doc v.2.7  
183 [44]. To remove ambiguous regions in the alignment the program Gblocks was used with the  
184 standard settings [45]. Newly generated sequences for both gene regions were deposited in  
185 GenBank (Table 3).

186  
187  
188

**Table 3. Details of cyst nematode populations included in the molecular and phylogenetic studies from cultivated potatoes in Colombia and reported in other studies.**

| <b><i>Globodera</i> species</b> | <b>Location<br/>(Municipality, Department)</b> | <b>Specimen code</b> | <b>Accession number 28S</b> | <b>Accession number ITS</b> |
|---------------------------------|------------------------------------------------|----------------------|-----------------------------|-----------------------------|
| <i>Globodera pallida</i>        | La Unión, AN*                                  | A1A                  | MH389939                    | MH389979                    |
| <i>Globodera pallida</i>        | La Unión, AN                                   | A1B                  | MH389938                    | MH389978                    |
| <i>Globodera pallida</i>        | La Unión, AN                                   | A1C                  | -                           | MH389977                    |
| <i>Globodera pallida</i>        | Ventaquemada, BO                               | B2A                  | MH389946                    | MH389986                    |
| <i>Globodera pallida</i>        | Ventaquemada, BO                               | B2B                  | MH389945                    | MH389985                    |
| <i>Globodera pallida</i>        | Ventaquemada, BO                               | B2C                  | MH389944                    | MH389984                    |
| <i>Globodera pallida</i>        | Ventaquemada, BO                               | B2D                  | MH389943                    | MH389983                    |
| <i>Globodera pallida</i>        | Arcabuco, BO                                   | B3D                  | MH389942                    | MH389982                    |
| <i>Globodera pallida</i>        | Chíquiza, BO                                   | B4D                  | MH389937                    | -                           |
| <i>Globodera pallida</i>        | Tunja, BO                                      | B5D                  | -                           | MH389976                    |
| <i>Globodera pallida</i>        | Toca, BO                                       | B6D                  | MH389936                    | MH389975                    |
| <i>Globodera pallida</i>        | Sogamoso, BO                                   | B7A                  | MH389935                    | MH389974                    |
| <i>Globodera pallida</i>        | Sogamoso, BO                                   | B7B                  | MH389934                    | -                           |
| <i>Globodera pallida</i>        | Sogamoso, BO                                   | B7D                  | MH389933                    | -                           |
| <i>Globodera pallida</i>        | Sora, BO                                       | B8A                  | MH389932                    | MH389973                    |

|                          |                |      |          |          |
|--------------------------|----------------|------|----------|----------|
| <i>Globodera pallida</i> | Sora, BO       | B8C  |          | MH389972 |
| <i>Globodera pallida</i> | Sora, BO       | B8D  |          | MH389971 |
| <i>Globodera pallida</i> | Samacá, BO     | B9D  | MH389941 | MH389981 |
| <i>Globodera pallida</i> | Soracá, BO     | B11A | MH389931 |          |
| <i>Globodera pallida</i> | Soracá, BO     | B11B | MH389930 |          |
| <i>Globodera pallida</i> | Soracá, BO     | B11C | MH389929 |          |
| <i>Globodera pallida</i> | Soracá, BO     | B12A | MH389940 | MH389980 |
| <i>Globodera pallida</i> | Susa, CU       | C1A  | MH389928 | MH389970 |
| <i>Globodera pallida</i> | Susa, CU       | C1B  | MH389927 |          |
| <i>Globodera pallida</i> | Susa, CU       | C1D  |          | MH389969 |
| <i>Globodera pallida</i> | Guatavita, CU  | C2B  | MH389926 | MH389968 |
| <i>Globodera pallida</i> | Guatavita, CU  | C2C  | MH389925 | MH389967 |
| <i>Globodera pallida</i> | Guatavita, CU  | C3C  | MH389923 | MH389965 |
| <i>Globodera pallida</i> | Guatavita, CU  | C3D  | MH389922 |          |
| <i>Globodera pallida</i> | Ubaté, CU      | C4C  | MH389921 |          |
| <i>Globodera pallida</i> | Ubaté, CU      | C4D  | MH389920 |          |
| <i>Globodera pallida</i> | Tausa, CU      | C5A  | MH389919 | MH389964 |
| <i>Globodera pallida</i> | Tausa, CU      | C5B  | MH389918 |          |
| <i>Globodera pallida</i> | Subachoque, CU | C6B  | MH389917 |          |

|                          |                 |      |          |          |
|--------------------------|-----------------|------|----------|----------|
| <i>Globodera pallida</i> | Sesquilé, CU    | C8A  | MH389916 |          |
| <i>Globodera pallida</i> | Sesquilé, CU    | C8C  | MH389915 | MH389963 |
| <i>Globodera pallida</i> | Sesquilé, CU    | C8D  |          | MH389962 |
| <i>Globodera pallida</i> | Cajicá, CU      | C10D |          | MH389961 |
| <i>Globodera pallida</i> | Villapinzón, CU | C11A | MH389914 | MH389960 |
| <i>Globodera pallida</i> | Villapinzón, CU | C11D | MH389913 | MH389959 |
| <i>Globodera pallida</i> | Túquerres, NA   | N2A  | MH389949 | MH389990 |
| <i>Globodera pallida</i> | Túquerres, NA   | N2B  | MH389948 | MH389989 |
| <i>Globodera pallida</i> | Túquerres, NA   | N2C  |          | MH389988 |
| <i>Globodera pallida</i> | Túquerres, NA   | N2D  | MH389947 | MH389987 |
| <i>Globodera pallida</i> | Guachucal, NA   | N4A  | MH389912 |          |
| <i>Globodera pallida</i> | Guachucal, NA   | N4B  | MH389911 |          |
| <i>Globodera pallida</i> | Guachucal, NA   | N4C  | MH389910 | MH389958 |
| <i>Globodera pallida</i> | Guachucal, NA   | N4D  | MH389909 |          |
| <i>Globodera pallida</i> | Belén, NA       | N5A  |          | MH389957 |
| <i>Globodera pallida</i> | Belén, NA       | N5B  |          | MH389956 |
| <i>Globodera pallida</i> | Belén, NA       | N5C  | MH389908 | MH389955 |
| <i>Globodera pallida</i> | Belén, NA       | N5D  | MH389907 | MH389954 |
| <i>Globodera pallida</i> | Ospina, NA      | N8B  |          | MH389953 |

|                                |              |     |          |            |
|--------------------------------|--------------|-----|----------|------------|
| <i>Globodera pallida</i>       | Ospina, NA   | N8C | MH389906 | MH389952   |
| <i>Globodera pallida</i>       | Ospina, NA   | N8D | MH389905 | MH389951   |
| <i>Globodera pallida</i>       | Ipiales, NA  | N9A | MH389904 | MH389950   |
| <i>Globodera sp</i>            | Chocontá, CU | C3A | MH389924 | MH389966   |
| <i>Globodera pallida</i>       | Peru         |     |          | GU084813.1 |
| <i>Globodera pallida</i>       | Peru         |     |          | GU084805.1 |
| <i>Globodera pallida</i>       | Chile        |     |          | GU084800.1 |
| <i>Globodera pallida</i>       | Ukraine      |     |          | AJ606687.1 |
| <i>Globodera pallida</i>       | England      |     |          | DQ847110.1 |
| <i>Globodera pallida</i>       | Poland       |     |          | EU855119.1 |
| <i>Globodera pallida</i>       | Peru         |     |          | GU084804.1 |
| <i>Globodera pallida</i>       | Peru         |     |          | GU084806.1 |
| <i>Globodera pallida</i>       | Peru         |     |          | HQ670269.1 |
| <i>Globodera mexicana</i>      | Mexico       |     |          | EU006707.1 |
| <i>Globodera mexicana</i>      | Mexico       |     |          | EU006708.1 |
| <i>Globodera rostochiensis</i> | USA          |     |          | EF153839.1 |
| <i>Globodera rostochiensis</i> | Australia    |     |          | EF622524.1 |
| <i>Globodera rostochiensis</i> | Canada       |     |          | FJ212166.1 |



|                                |           |  |            |            |
|--------------------------------|-----------|--|------------|------------|
| <i>Globodera rostochiensis</i> | England   |  |            | EF153840.1 |
| <i>Globodera rostochiensis</i> | Bolivia   |  |            | GU084809.1 |
| <i>Globodera tabacum</i>       | Japan     |  |            | AB207272.1 |
| <i>Globodera tabacum</i>       | USA       |  |            | GQ294525.1 |
| <i>Globodera tabacum</i>       | USA       |  |            | DQ847112.1 |
| <i>Globodera tabacum</i>       | Argentina |  |            | DQ097515.2 |
| <i>Globodera ellingtonae</i>   | USA       |  |            | GQ896543.1 |
| <i>Globodera ellingtonae</i>   | Chile     |  |            | GU084808.1 |
| <i>Globodera ellingtonae</i>   | USA       |  |            | DQ097514.2 |
| <i>Punctodera punctata</i>     | Belgium   |  |            | AF274416.1 |
| <i>Punctodera chalcoensis</i>  | Mexico    |  |            | AY090885.1 |
| <i>Globodera pallida</i>       | France    |  | KJ409636.1 |            |
| <i>Globodera pallida</i>       | Slovakia  |  | KJ409626.1 |            |
| <i>Globodera pallida</i>       | England   |  | JN712219.1 |            |
| <i>Globodera pallida</i>       | Chile     |  | JN712220.1 |            |
| <i>Globodera pallida</i>       | France    |  | GU338021.1 |            |
| <i>Globodera ellingtonae</i>   | USA       |  | JN712217.1 |            |
| <i>Globodera tabacum</i>       | USA       |  | GQ294492.1 |            |
| <i>Globodera rostochiensis</i> | Canada    |  | JN712223.1 |            |

|                                |          |  |            |  |
|--------------------------------|----------|--|------------|--|
| <i>Globodera rostochiensis</i> | Slovakia |  | KJ409625.1 |  |
| <i>Globodera artemisiae</i>    | Hungary  |  | KU845472.1 |  |

189 28S= Large ribosomal RNA subunit and ITS= internal transcribed spacer 1 and 2 including 5.8S rRNA

190 Phylogenetic relationships among partial sequences of the 28S rRNA and Internal  
191 Transcribed Spacer 1 and 2 plus 5.8S rRNA genes were inferred using Bayesian Inference (BI)  
192 and Maximum Likelihood (ML) methods. For both gene regions, the best sequence partition  
193 strategy was identified with the Bayesian Information Criterion in PartitionFinder v.2.0 [46]. The  
194 sequence partition for 28S rRNA gene was a single partition with HKY substitution model [47]  
195 for each of the 3 positions of the codon. The best sequence partition for ITS1-2 + 5.8S rRNA  
196 gene internal transcribed spacer 1 and 2 including the 5.8S rRNA region was a partition that  
197 included the first and second position of the codon with a K80 model [48] substitution model,  
198 and a second partition that consisted on the third codon position under the K80 with proportions  
199 of invariable sites (K80+I). Bayesian Inference analyses were performed using MrBayes v.3.1.2  
200 [49], with five independent runs of four Markov chains for  $1 \times 10^6$  generations and default  
201 heating values, sampling every 100 generations with 2500 samples discarded as burn-in after  
202 checking for convergence. Clades were considered strongly supported when values were  $> 0.95$   
203 [50]. For Maximum likelihood analyses the software GARLI v.2.0 [51] was used. Bootstrap  
204 support for trees was generated with 1,000 replicate searches and summarized in a consensus tree  
205 using SumTrees [52], clades were considered as well/strongly supported when bootstrap was  
206  $>70\%$ . In addition, in order to characterize the genetic divergence between cyst nematodes from  
207 Colombia and *Globodera* species already reported, the average number of nucleotide substitution  
208 per site ( $D_{xy}$ ), net nucleotide substitutions per site ( $D_a$ ) and number of fixed differences ( $F_d$ )  
209 among genetic groups were computed using DnaSP v.6.11.01 [53].

210

## 211 **Morphometric characterization**

212 For morphometric characterization, 8 to ten cyst nematodes were taken from each of the  
213 26 pooled populations obtained for molecular analysis. Cysts were cleaned and fixed in  
214 formaldehyde at 3% allowing preservation in glycerin [7,28]. Then, cysts and vulval cones were  
215 photographed and measured using image visualization software (iSolution lite; IMT i-Solution).  
216 Morphometric measurements included body width (BW), body length excluding neck (BL),  
217 L/W ratio, distance from anus to the nearest edge from fenestra (DAF), fenestra length (FL),  
218 Granek's ratio (GR), and number of cuticular ridges between vulva and anus (NCR) [7,28].  
219 One-way Analysis of variance (ANOVA) was performed on each morphometric variable. The  
220 Tukey Studentized Range HDS (Honest Significant Difference) test was used to determine  
221 significant differences among population means on the different morphometric measurements at  
222  $P \leq 0.05$ .

223 A linear discriminant analysis (LDA) and a stepwise discriminant analysis (SDA) were  
224 also used to determine the best combination of variables that would separate populations based  
225 on morphological features. These methods derive a linear combination of variables that  
226 summarize between-class variation. The variables included in the initial function for both  
227 methods were BW, BL, DAF, FL, NCR, LWR, and GR. The pooled within canonical structure  
228 and pooled within class standardized canonical coefficients from the SDA were used to  
229 determine each variable's contribution to the discriminant function. The linear and stepwise  
230 discriminant analyses were performed with JMP 14.0.0 (SAS Institute Inc., Cary, NC).

231

## 232 **Results**

### 233 **Field survey**

234 Of the 589 potato fields sampled, cyst nematodes were detected in 355 fields distributed  
235 in 69 municipalities of Colombia, with densities ranging from 1 to 1,327 cysts per 100 cm<sup>3</sup> of  
236 soil (Table 1). The predominant species was *G. pallida*, identified in 51% of the fields sampled  
237 in Cundinamarca, 63.3% in Boyacá, 72.2% in Nariño, 54% in Antioquia, 45% in Cauca, 33% in  
238 Norte de Santander, 29% in Santander, 17% in Tolima and 14% in Caldas, with densities ranging  
239 from 1 to 1327 cysts/100 cm<sup>3</sup> of soil, 1 to 873 cysts/100 cm<sup>3</sup> of soil, 1 to 345 cysts/100 cm<sup>3</sup> of  
240 soil, 1 to 51 cysts/100 cm<sup>3</sup> of soil, 1 to 23 cysts/100 cm<sup>3</sup> of soil, 1 to 4 cysts/100 cm<sup>3</sup> of soil, 1 to  
241 6 cysts/100 cm<sup>3</sup> of soil, 1 to 3 cysts/100 cm<sup>3</sup> of soil and 1 to 2 cysts/100 cm<sup>3</sup> of soil, respectively.  
242 Among municipalities, the highest mean densities were detected in Ubaté (443.3 cysts/100 cm<sup>3</sup>  
243 of soil), followed by Sora, Arcabuco, Belén, Sogamoso, Túquerres and Tausa (185, 122.5, 122.3,  
244 107.5, 97.3 and 84,2 cysts/100 cm<sup>3</sup> of soil, respectively). Cyst nematodes were not found in  
245 Pasca, Sibaté, Simijaca, and La Calera in Cundinamarca, nor in Ciénega in Boyacá (Table 1). All  
246 samples positive for PCN showed cysts with viable eggs, and viability percentage ranged from  
247 15 to 80%. Boyacá and Cundinamarca were the departments that had in average the higher  
248 viability (Table 1).

249 Given host-based grouping, PCN was detected in samples taken from varieties of  
250 *Solanum tuberosum* Group *Andigena* such as Diacol Capiro (107 out of 158 samples), Betina (24  
251 out of 30 samples), Pastusa Suprema (81 out of 167 samples), Tocarreña (10 out of 20 samples),  
252 Rubí (2 out of 3 samples), ICA Única (4 out of 16 samples), ICA Nevada (2 out of 3 samples)  
253 and, from varieties of *Solanum tuberosum* Group *Phureja* such as Criolla variety (32 out of 69  
254 samples) (Table 1). A morphologically different species (under description), was only detected in  
255 one field in Chocontá (Cundinamarca) on Suprema variety.

256

## 257 **Molecular analysis**

258           The amplification of D2-D3 expansion segments of 28S rRNA and internal transcribed  
259 spacer 1, 2 including the 5.8S rRNA yielded single fragments of 609 and 848 bp, respectively.  
260 Forty-two new D2-D3 of 28S rRNA gene sequences and twenty-eight new internal transcribed  
261 spacer 1 and 2 including the 5.8S rRNA were obtained in the present study (Table 2).

262           Phylogenetic relationships inferred from analyses of D2-D3 expansion segments of 28S  
263 rRNA of a multiple-edited alignment (57 sequences), showed two well supported major clades  
264 based on BI and ML inferences (PP= 1.00, BP= 90) (Fig 2). A highly supported clade (i) (PP=  
265 1.00, BP= 90), was formed by sequences of *G. pallida* from France, Chile, England, Slovakia  
266 and all but one cyst nematode sequence obtained in this study from Colombia. The second major  
267 clade, Clade (ii) grouped three species, *G. ellingtonae* and *G. tabacum* that formed a well-  
268 supported subclade (PP=1.00, BP=83) clearly separated from a polytomy formed by a single cyst  
269 nematode sample (*G. sp*) from Colombia and *G. rostochiensis* from Canada and Slovakia (Fig 2).

270

271

272 **Fig 2. Phylogenetic relationships within the genus *Globodera*. Bayesian 50 % majority rule**  
273 **consensus trees as inferred from D2–D3 expansion segments of 28S rRNA as a single**  
274 **partition with HKY model.**

275 Node-support values: Left value posterior probability BI shown if >95%, right value bootstrap  
276 from ML analysis shown only if >70%. Newly obtained sequences in this study are in bold.

277           The 50% majority-rule BI consensus tree of the alignment generated for the 69 sequences  
278 of the region conformed by the internal transcribed spacer 1 and 2 including the 5.8S rRNA  
279 regions, showed two well supported major clades (PP=1.00/ BP=100) that were consistent with  
280 the findings based on 28S rRNA phylogeny (Fig 3). Clade (i) was formed by *G. pallida* and *G.*  
281 *mexicana*, and Clade (ii) was formed by *G. rostochiensis*, *G. tabacum*, *G. ellingtonae* and one  
282 sequence from Colombia. In Clade (i) two sequences of *G. pallida* from Peru along with the rest  
283 of sequences from Colombia formed a well-supported subclade (PP=1.00, BP=90) that was  
284 clearly separated (PP=1.00, BP=94) from one sequence of *G. pallida* from Peru. The sister clade  
285 of this sub-clade was formed by other sequences of *G. pallida* from Peru and European countries  
286 such as Ukraine, England and Poland, that were separated with high support (PP= 1.00, BP= 96)  
287 from sequences of *G. mexicana* and moderately support (PP= 1.00, BP= 79) of *G.pallida* from  
288 Chile and Peru. In Clade (ii) a single sequence from Colombia formed a well-supported subclade  
289 (PP=1.00, BP=93) along with *G. rostochiensis* from USA, Australia, Canada, England and  
290 Bolivia that was related with *G. tabacum* from Japan, USA and Argentina. This subclade formed  
291 a sister clade with *G. ellingtonae* from USA and Chile with high support (PP=1.00, BP=74).

292

293

294 **Fig 3. Phylogenetic relationships within the genus *Globodera*. Bayesian 50 % majority rule**  
295 **consensus trees as inferred from Internal Transcribed Spacer 1 and 2 plus 5.8S rRNA gene**  
296 **with first and second position with K80 substitution model, and a second partition with the**  
297 **third codon under K80+I model.**

298 Node-support values: Left value posterior probability BI shown if >95%, right value bootstrap  
299 from ML analysis shown only if >50%. Newly obtained sequences in this study are in bold.

300 Genetic distances among cyst nematodes sequences from Colombia and other nematodes  
301 species included in the phylogenetic analyses are summarized in Table 4. Based on the 28S  
302 rRNA gene sequences, all sequences from Colombia from Clade (i) had the lowest average  
303 number of nucleotide substitutions per site (Nucleotide divergence -  $D_{xy}$ = 0.002) and lowest  
304 number of net nucleotide substitutions per site (net genetic distance -  $D_a$ = 0.001) when  
305 compared to *G. pallida* sequences from the other countries without fixed differences among  
306 groups (Table 4). The cyst nematode sequence from Colombia in Clade (ii) had the lowest  
307 divergence when compared with *G. rostochiensis* ( $D_{xy}$ = 0.001,  $D_a$ = 0.000) without showing any  
308 fixed differences among groups (Table 4). In agreement with the 28S rRNA marker, the genetic  
309 distances based on the internal transcribed spacer 1 and 2 including the 5.8S rRNA gene  
310 sequences of cyst nematodes from Colombia in Clade (i) was lowest when compared with *G.*  
311 *pallida* ( $D_{xy}$ = 0.014,  $D_a$ = 0.008), with one fixed substitution (Fig 3, Table 4) and lowest in  
312 Clade (ii) when compared with *G. rostochiensis* ( $D_{xy}$ = 0.003,  $D_a$ = 0.000) with no fixed  
313 differences among groups (Table 4).



314 **Table 4. Gene divergence between potato cyst nematodes from Colombia and other species retrieved from GenBank. Dxy, Da**  
 315 **and Fd correspond to average number of nucleotide substitutions per site, the number of net nucleotide substitutions per site,**  
 316 **and number of fixed differences between compared groups, respectively.**  
 317

| Marker | Group 1                      | Group 2                 | Dxy     | Da      | Fd |
|--------|------------------------------|-------------------------|---------|---------|----|
| 28S    | <i>G. pallida</i> - Colombia | <i>G. pallida</i>       | 0.00227 | 0.00116 | 0  |
|        |                              | <i>G. rostochiensis</i> | 0.01072 | 0.00988 | 4  |
|        |                              | <i>G. ellingtonae</i>   | 0.01370 | 0.01243 | 6  |
|        |                              | <i>G. tabacum</i>       | 0.01443 | 0.01400 | 6  |
|        |                              | <i>G. artemisiae</i>    | 0.02661 | 0.02618 | 15 |
| 28S    | <i>G. sp</i> - Colombia      | <i>G. pallida</i>       | 0.01165 | 0.01013 | 6  |
|        |                              | <i>G. rostochiensis</i> | 0.00125 | 0.00000 | 0  |
|        |                              | <i>G. ellingtonae</i>   | 0.00498 | 0.00332 | 2  |
|        |                              | <i>G. tabacum</i>       | 0.00415 | 0.00332 | 2  |
|        |                              | <i>G. artemisiae</i>    | 0.02076 | 0.01993 | 12 |
| ITS    | <i>G.pallida</i> - Colombia  | <i>G. pallida</i>       | 0.01418 | 0.00818 | 1  |
|        |                              | <i>G. rostochiensis</i> | 0.03188 | 0.02871 | 21 |
|        |                              | <i>G. ellingtonae</i>   | 0.02973 | 0.02634 | 18 |
|        |                              | <i>G. tabacum</i>       | 0.02721 | 0.02550 | 20 |
|        |                              | <i>G. mexicana</i>      | 0.02035 | 0.02026 | 16 |
| ITS    | <i>G.sp</i> - Colombia       | <i>G. pallida</i>       | 0.03230 | 0.02600 | 20 |

|  |                         |         |         |    |
|--|-------------------------|---------|---------|----|
|  | <i>G. rostochiensis</i> | 0.00395 | 0.00027 | 0  |
|  | <i>G. ellingtonae</i>   | 0.02582 | 0.02189 | 16 |
|  | <i>G. tabacum</i>       | 0.01675 | 0.01478 | 12 |
|  | <i>G. mexicana</i>      | 0.03289 | 0.03230 | 27 |

318 28S= Large ribosomal RNA subunit and ITS= internal transcribed spacer 1 and 2 including 5.8S rRNA

## 319 **Cyst nematodes morphometric characterization**

320 A total of 233 cysts were examined for morphometric measurements. Considerable  
321 degree of overlap was observed and all morphometric characters examined were significantly  
322 variable among populations (Fig 4): BL (DF= 24, F= 7.24,  $P < 0.0001$ ), BW (DF= 24, F= 7.23,  
323  $P= 0.0001$ ), L/W ratio (DF= 24, F= 2.21,  $P= 0.0016$ ), DAF (DF= 24, F= 2.39,  $P= 0.0005$ ), FL  
324 (DF= 24, F= 3.23,  $P < 0.0001$ ), GR (DF= 24, F= 3.23,  $P= 0.0001$ ) and NCR (DF= 24, F= 1.68,  
325  $P= 0.0297$ ) (Fig. 4). Cysts in C10, showed the highest BL ( $639.42 \pm 20.99 \mu\text{m}$ ) and BW ( $637.05$   
326  $\pm 21.42 \mu\text{m}$ ) and A1 population had the smallest mean size ( $417.67 \pm 20.99 \mu\text{m}$  BL,  $402.34 \pm$   
327  $21.43 \mu\text{m}$  BW). C3 showed significant differences on morphometric characters in the perineal  
328 area in comparison with the other populations, with a highest mean DAF ( $62.86 \pm 5.43 \mu\text{m}$ ), a  
329 lowest significant FL ( $18.43 \pm 1.91 \mu\text{m}$ ), a significant higher GR (3.6) and the highest NCR  
330 (ranging from 10 to 16). For the other populations, DAF was in average  $47.48 \mu\text{m}$ , FL was  $26.45$   
331  $\mu\text{m}$ , GR (1.8) and the NCR was 9. Nevertheless, some populations showed values outside of the  
332 range, for instance, B7 and B8 had the lowest mean DAF ( $36.28 \pm 5.15 \mu\text{m}$  and  $36.75 \pm 5.43 \mu\text{m}$ )  
333 and B2 had a highest significant FL ( $36.30 \pm 1.81 \mu\text{m}$ ) and lowest GR (1.3) (Fig 4).

334

335

336

### 337 **Fig 4. Boxplots showing morphological characters variation among PCN populations from** 338 **cultivated potatoes in Colombia.**

339 Mean values shown for each population based on ANOVA (Tukey HSD test) at  $P \leq 0.05$ . BL  
340 (Body length ( $\mu\text{m}$ ): DF= 24, F= 7.24,  $P < 0.0001$ ), BW (Body width ( $\mu\text{m}$ ): DF= 24, F= 7.23,  $P=$   
341  $0.0001$ ), L/W ratio: DF= 24, F= 2.21,  $P= 0.0016$ , DAF (distance from anus to the nearest edge  
342 from fenestra ( $\mu\text{m}$ ): DF= 24, F= 2.39,  $P= 0.0005$ ), FL (Fenestra length ( $\mu\text{m}$ ): DF= 24, F= 3.23,  $P$   
343  $< 0.0001$ ), GR (Granek's ratio: DF= 24, F= 3.23,  $P= 0.0001$ ), NCR (Number of cuticular ridges:  
344 DF= 24, F= 1.68,  $P= 0.0297$ ).

345 Two analyses were used to identify the variables that would separate species in the  
346 sampled populations. The LDA showed the variance associated with the first three canonical  
347 variables was 79% of the total variation and had the highest partial correlations between the  
348 canonical variables and the covariates, adjusted for the group variable (Table 5). Thus, the  
349 variables BW, NCR and GR in the SDA were selected in this order (Table 6). Canonical variable  
350 1 had the highest correlation with BW (0.9392) followed by GR (0.2305), suggesting that  
351 separation of the groups on this axis was mostly due to plastic differences in body size.  
352 Canonical variable 2 had the highest correlation with GR (0.7752) followed by NCR (0.1785),  
353 therefore, separation of groups on this axis was mainly to differences in characters associated  
354 with features in the perineal area. Canonical variable 3 was most correlated with NCR (0.9838)  
355 followed by GR (0.5881), characters often used to discriminate PCN species (Table 6). The  
356 grouping and separation of populations using these three canonical variables is shown in Figure  
357 5. Despite significant overlap of the 95% confidence ellipse for each population mean, canonical  
358 variable 1 distinctly separated some populations pairs with populations A1 and C10 at opposite  
359 sides of the axis. Canonical variable 2 distinctly separated population C3, which 95%  
360 confidence ellipse only partially overlapped with population C5 (Fig 5). Interestingly, few  
361 individuals from populations C11, B9, N2 and, C8 were also near population C3 95% confidence  
362 level ellipse mean, as few C3 individuals were more similar to other populations 95% confidence  
363 level ellipse mean (Fig 5).

364 **Table 5. Canonical details calculated from the overall pooled within-group covariance matrix of potato cyst nematodes**  
 365 **morphometric characterization.**

366  
 367

| <b>Eigenvalue</b> | <b>Percent</b> | <b>Cum Percent</b> | <b>Canonical Correlation</b> | <b>Likelihood Ratio</b> | <b>Approx. F</b> | <b>NumDF</b> | <b>DenDF</b> | <b>Prob&gt;F</b> |
|-------------------|----------------|--------------------|------------------------------|-------------------------|------------------|--------------|--------------|------------------|
| 0.9263            | 38.3535        | 38.3535            | 0.6934                       | 0.1464                  | 2.6425           | 168.0000     | 1347.3000    | <.0001*          |
| 0.6019            | 24.9240        | 63.2774            | 0.6130                       | 0.2820                  | 2.0525           | 138.0000     | 1168.2000    | <.0001*          |
| 0.3802            | 15.7407        | 79.0182            | 0.5248                       | 0.4517                  | 1.5764           | 110.0000     | 984.5800     | 0.0003*          |
| 0.1972            | 8.1635         | 87.1816            | 0.4058                       | 0.6234                  | 1.2048           | 84.0000      | 796.3800     | 0.1112           |
| 0.1559            | 6.4571         | 93.6387            | 0.3673                       | 0.7463                  | 1.0363           | 60.0000      | 603.4900     | 0.4054           |
| 0.0972            | 4.0254         | 97.6641            | 0.2977                       | 0.8627                  | 0.8186           | 38.0000      | 406.0000     | 0.7713           |
| 0.0564            | 2.3359         | 100.0000           | 0.2311                       | 0.9466                  | 0.6394           | 18.0000      | 204.0000     | 0.8658           |

369 **Table 6. Canonical structure and standardized canonical coefficients of potato cyst**  
370 **nematodes morphometric characterization.**  
371

| Variable* | Pooled within canonical structure |         |        | Pooled within-class standardized canonical coefficients |         |         |
|-----------|-----------------------------------|---------|--------|---------------------------------------------------------|---------|---------|
|           | Can1                              | Can2    | Can3   | Can1                                                    | Can2    | Can3    |
| BW        | 0.9392                            | -0.2590 | 0.2255 | 0.9663                                                  | -0.3197 | 0.0428  |
| NCR       | 0.0155                            | 0.1785  | 0.9838 | -0.4807                                                 | -0.7352 | 1.1574  |
| GR        | 0.2305                            | 0.7752  | 0.5881 | 0.4335                                                  | 1.3524  | -0.2521 |

372  
373 \* BW= body width; NCR = Number of cuticular ridges between vulva and anus; GR = Granek's  
374 ratio.  
375

376

377

378

379 **Fig 5. Canonical plot scores and 95% confidence ellipses from stepwise discriminant**  
380 **function analysis of three morphometric characteristics of PCN nematode cyst from**  
381 **Colombia.**

382 Each ellipse corresponds to a 95% confidence limit for the population multivariate mean.  
383 Significantly different populations have non-intersecting circles. The set of rays that appears in  
384 the plot represents the covariates in which the length and direction of each ray indicates the  
385 degree of association of the corresponding covariate with the first two canonical variables. The  
386 arrow indicates C3 population 95% confidence interval. NCR, number of cuticular ridges, GR,  
387 Granek's ratio, BW, body weight.

## 388 **Discussion**

389           Even when PCN is considered a re-emerging potato pathogen in Colombia, first  
390 identified in the department of Nariño in 1970 [23], documented surveys only report PCN in  
391 municipalities of Nariño, Cauca, Boyacá and Cundinamarca [24,25]. Our comprehensive study  
392 that sampled 75 municipalities in 9 potato producing departments of Colombia found that 60% of  
393 the tested samples were positive for PCN (355 out of 589 sampled fields), and that the pathogen  
394 is widespread in all Colombian producing potato departments (Cundinamarca, Boyacá, Nariño,  
395 Antioquia, Cauca, Norte de Santander, Santander, Tolima and Caldas), with cysts that contain  
396 viable eggs present in all sampled departments.

397           However, there was variation in population densities among departments. The highest  
398 densities were found in Cundinamarca and Boyacá, ranging from 1 to 1,327 cyts/100 g of soil  
399 and 1 to 873 cysts/100 g of soil, respectively. Nieto et al. (1983) [24] surveyed these departments  
400 in early 1980s, but since detected cysts were empty or contained non-viable eggs, these regions  
401 were declared as PCN free. Later, Arciniegas et al (2012) [25], reported PCN in Tunja, Samacá  
402 and Ventaquemada in Boyacá and Tausa, Tabio and Zipaquirá in Cundinamarca. In our study,  
403 PCN was detected in new municipalities with the highest densities found in Tausa, Ubaté and  
404 Villapinzón in Cundinamarca and, in Arcabuco, Belén, Tunja, Samacá, Sogamoso and Sora in  
405 Boyacá (Table 1). Boyacá and Cundinamarca are the largest producers of potatoes in Colombia,  
406 with 40,724 and 61,322 harvested hectares corresponding to 26% and 39% of the total potato  
407 national production in 2018, respectively [26]. Potatoes are the main plant crop grown by  
408 farmers and fields are usually planted in monocultures for several continuous cycles. As PCNs  
409 are highly specialized, sedentary and obligate endoparasites of solanaceous plants [1,22,54], the  
410 constant presence of potato crops in monocultures for several cycles may lead to persistence and

411 increase of this plant pathogen in these two regions overtime. In contrast, in Nariño department,  
412 although the nematode was found in all municipalities sampled, PCN densities were lower, from  
413 1 to 345 cysts/100 g of soil, and similar ranges were found by Nieto et al (1983) [24]. Nariño  
414 ranks third in production with 31,611 harvested hectares (19,35% of total potato national  
415 production), in contrast to Boyacá and Cundinamarca, in this department farmers usually grow  
416 different potato cultivars within a field (e.g. Diacol Capiro, Pastusa Suprema, Betina) with a crop  
417 rotation scheme usually with non-host plants such as corn, cabbage, lettuce, onion and pastures,  
418 and the use of biological microorganisms for the control of other pest problems has also  
419 implemented [55], which reduces pesticides use. Similar potato production scheme was  
420 observed in its neighbor department, Cauca, and PCN densities decreased in the latter from 23  
421 cysts/100 g of soil [24] to 5,97 cysts/100 of soil in this study. Considering that *G. pallida*  
422 requires a living potato plant to complete its life cycle [6], the management practices  
423 implemented in both departments may reflect the reduction of PCN densities in these regions.

424 Our results also show *G. pallida* populations have spread into new regions of Colombia.  
425 In the departments of Antioquia, Caldas, Tolima, Santander and Norte de Santander, PCN was  
426 detected in all municipalities sampled, although with low population levels (5.97 cysts/100 of  
427 soil in average in Antioquia, 0.95 cysts/100 of soil in Norte de Santander, 0.8 cysts/100 of soil in  
428 Santander, 0.43 cysts/100 of soil in Caldas and 0.3 cysts/100 of soil in Tolima). To our  
429 knowledge, this is the first report of the presence of *G. pallida* in these departments. These  
430 regions represent in general, low potato growing areas with low participation in national potato  
431 production (2.27% in average in 2018) [26], and were therefore considered before as PCN free.  
432 The spread of PCN is mainly caused through tubers, soil or equipment contaminated with cysts  
433 [54] and potato seed tubers in these departments frequently come from Boyacá and



434 Cundinamarca, which may allow the dissemination of this plant pathogen into these new regions.  
435 Nevertheless, population levels in these departments are low and the extent of PCN is limited,  
436 therefore, to maintain low levels and to avoid the spread into new areas, intensive monitoring  
437 program for PCN should be implemented in all potato producing regions of Colombia.

438

## 439 **Molecular identification and phylogenetic relationships of PCN species from** 440 **Colombia**

441 The molecular phylogeny of PCN populations based on ITS1-5.8S-ITS2 rDNA and 28S  
442 D2-D3 regions supported the presence of at least two PCN species in Colombia. *Globodera*  
443 *pallida* was found in all populations that resulted positive for PCN and, molecular phylogeny  
444 based on the ITS1-5.8S-ITS2 rDNA grouped all *G. pallida* from Colombia in a single clade that  
445 was closely related to P5A pathotype strains (GenBank accession number HQ670270.1) and  
446 clone La Libertad (GenBank accession number GU084818) (Fig 3). This finding suggests that *G.*  
447 *pallida* present in Colombia have a different origin than *G. pallida* present in countries such as  
448 Ukraine, England and Poland that cluster as a monophyletic clade with other Peruvian strains,  
449 and *G. pallida* present in Chile that cluster with a different Peruvian strain (Figs 2 and 3).  
450 Despite that P5A peruvian strain has been considered as a different species [12,17], a recent  
451 study based on ITS rRNA, *COI* and *cytb* mitochondrial regions concluded that all clades within  
452 *G. pallida* belong to a single species [2]. The 28S D2-D3 phylogeny, although with lower level  
453 of resolution, also clustered all but one PCN populations from Colombia with *G. pallida* around  
454 the globe as a monophyletic clade (Fig 2). For both gene regions, a single sequence from the C3  
455 population grouped in a distant clade along with individuals of *G. rostochiensis*. Genetic distance  
456 analyses based on gene regions ITS1-5.8S-ITS2 and D2-D3, were congruent with these findings

457 showing *G. pallida* from Colombia with the smallest *Da* (0.8 % and 0.12% for ITS rDNA and  
458 D2-D3, respectively) and the smallest *Dxy* (1.41 % and 0.23 % for ITS rDNA and D2-D3,  
459 respectively) when compared with other *G. pallida* populations. Similarly, genetic distances  
460 from C3 population showed the lowest distance when compared with *G. rostochiensis* (*Dxy*=  
461 0.001, *Da*= 0.000).

462 Therefore, the ITS1-5.8S-ITS2 rDNA and 28S D2-D3 molecular analyses were able to  
463 identify with high phylogenetic support *G. pallida* and *G. rostochiensis*. Additionally, ITS1-  
464 5.8S-ITS2 rDNA phylogenetic resolution supports a northern Peru origin of *G. Pallida* present in  
465 Colombia, nevertheless this hypothesis must be further investigated using additional samples and  
466 molecular markers, with statistical inference such as model testing and coalescent demographic  
467 reconstruction. Although with less taxa included, molecular phylogeny based on 28S D2-D3  
468 gene improved the node support found in previous phylogenies between *G. pallida* and  
469 *G.tabacum* (i.e. PP = 54 and 72%) (e.g.,[9,16]), and the unresolved positions for *G. rostochiensis*  
470 [16]. Taken all together, both DNA markers used in this study showed to be useful to identify  
471 *Globodera* species present in Colombia, with ITS1-5.8S-ITS2 rDNA being more informative in  
472 phylogeographic perspective [12].

473

#### 474 **Morphometric identification of PCN species from Colombia**

475 The use of stepwise and canonical analysis is an effective method for grouping and  
476 distinguishing species and populations from different taxa [56–59]. Despite a significant degree  
477 of overlap in morphometric data (Figs 4 and 5), canonical discriminant analyses identified two  
478 main groups based on cyst morphometric measurements. *Globodera pallida* individuals were  
479 observed in the canonical discriminant plot as populations were overlapping across canonical 1,

480 indicating a wide variation in BW size associated with phenotypic plasticity (Fig 5). The wide  
481 morphometric variation observed within *G. pallida* from Colombia populations have also been  
482 reported in other populations of *G. pallida* as well as for other *Globodera* species [9,17,60]. It is  
483 often expected that observed morphological variation within *Globodera* species increases as new  
484 populations are analyzed [7,17]. However, since wide morphometric variability within and  
485 among populations of *G. pallida* was detected, future research should be performed to elucidate  
486 the degree in which cryptic species and phenotypic plasticity occur among PCN associated with  
487 potato crops in Colombia. On the other hand, individuals from C3 population were observed in  
488 the top portion of the canonical discriminant analyses, with all but one individual outside the C3  
489 95% confidence ellipse across canonical 2 (Fig 5). The presence of individuals from population  
490 B9, N2 and C11 near population C3 position in the canonical space, suggests the possibility of a  
491 wider distribution of *G. rostochiensis* associated Colombian potato crops, since morphological  
492 measurements of these individuals fit in the range of *G. rostochiensis*. However, to confirm the  
493 presence of this PCN species in Colombia, further research should include genetic and  
494 morphological data from additional individuals (cysts, juveniles and males) as well as  
495 pathogenicity assessment of these Colombian isolates.

496

## 497 **Conclusions**

498 This study provides new information about the status and prevalence of PCN species  
499 associated with cultivated potatoes in the main producing regions of Colombia including for the  
500 first time genetic and morphological information. Molecular phylogenies with ITS1-5.8S-ITS2  
501 rDNA and D2/D3 28S regions and morphometric measurements of cysts were effective in the  
502 identification of *G. pallida*, the dominant species present in all departments surveyed in this

503 study, and suggest the presence of *G. rostochiensis*, in one municipality of Cundinamarca, which  
504 is currently under description. Considering the presence of PCN species constitute a threat for  
505 potato production, intensive sampling and monitoring of this plant pathogen should be conducted  
506 in order to reduce and prevent the spread into new areas. The development of management  
507 practices that involves the evaluation of resistant varieties for populations that tested positive for  
508 PCN, as well as other practices such as crop rotations, trap crops, biofumigants, biocontrol  
509 agents among others that have shown to be effective for other *G. pallida* populations worldwide,  
510 are also a crucial step to reduce population densities of PCN in Colombia.

511

## 512 **Acknowledgments**

513 The authors thank the Colombian Ministry of Agriculture for funding the Project  
514 “Recomendaciones técnicas para el manejo integrado de los problemas fitosanitarios: *Globodera*  
515 *pallida*, síndrome X, virus PYVV y sus posibles vectores en papa”, as well as the supporting  
516 research assistant of Corporación Colombiana de Investigación Agropecuaria, La Selva Research  
517 Station, Mario Alonso Mesa, for greenhouse and field work.

518

## 519 **Contributions**

520 **Conceptualization:** Olga Y. Pérez, Claudia M. Holguin.

521 **Data curation:** Daniela Vallejo, Diego A. Rojas, John A. Martinez, Sergio Marchant, Claudia  
522 M. Holguin, Olga Y. Pérez.

523 **Formal analysis:** Sergio Marchant, Claudia M. Holguin, Daniela Vallejo.

524 **Investigation:** Daniela Vallejo, Diego A. Rojas, John A. Martinez, Sergio Marchant, Claudia M.  
525 Holguin, Olga Y. Pérez.  
526 **Methodology:** Daniela Vallejo, Diego A. Rojas, John A. Martinez, Sergio Marchant, Claudia M.  
527 Holguin, Olga Y. Pérez.  
528 **Writing - original draft:** Claudia M. Holguin, Sergio Marchant, Daniela Vallejo, Diego A.  
529 Rojas, John A. Martinez, Olga Y. Pérez.  
530 **Writing - review & editing:** Claudia M. Holguin, Sergio Marchant, Olga Y. Pérez.

531

## 532 **References**

- 533 1. Jones JT, Haegeman A, Danchin EGJ, Gaur HS, Helder J, Jones MGK, et al. Top 10  
534 plant-parasitic nematodes in molecular plant pathology. *Mol Plant Pathol.* 2013;14: 946–  
535 961. doi:10.1111/mpp.12057
- 536 2. Subbotin SA, Franco J, Knoetze R, Roubtsova T V., Bostock RM, Cid Del Prado Vera I.  
537 DNA barcoding, phylogeny and phylogeography of the cyst nematode species from the  
538 genus *Globodera* (Tylenchida: Heteroderidae). *Nematology.* 2020;22: 269–297.  
539 doi:10.1163/15685411-00003305
- 540 3. Van Riel HR, Mulder A. Potato cyst nematodes (*Globodera* species) in Western Europe.  
541 In: Marks R, Brodie B, editors. *Potato cyst nematodes: Biology, distribution and control.*  
542 Wallingford: CAB International; 1998. pp. 271–298.
- 543 4. O.E.P.P./E.P.P.O. PM 7/40 (4) *Globodera rostochiensis* and *Globodera pallida*. *EPPO*  
544 *Bull.* 2017;47: 174–197. doi:10.1111/epp.12391
- 545 5. Talavera M, Andreu M, Valor H, Tobar A. Nematodos fitoparasiticos en areas 21  
546 productoras de patata de Motril y Salobrena. *Invest Agric Prod Prot Veg.* 1998;13: 87–95.
- 547 6. Contina JB, Dandurand LM, Knudsen GR. A spatiotemporal analysis and dispersal  
548 patterns of the potato cyst nematode *globodera pallida* in Idaho. *Phytopathology.*  
549 2020;110: 379–392. doi:10.1094/PHYTO-04-19-0113-R
- 550 7. Handoo ZA, Carta LK, Skantar AM, Chitwood DJ. Description of *globodera ellingtonae*  
551 n. sp. (Nematoda: Heteroderidae) from Oregon. *J Nematol.* 2012;44: 40–57.
- 552 8. Skantar AM, Handoo ZA, Carta LK, Chitwood DJ. Morphological and molecular  
553 identification of *Globodera pallida* associated with potato in Idaho. *J Nematol.* 2007;39:  
554 133–144.
- 555 9. Lax P, Rondan Dueñas JC, Franco-Ponce J, Gardenal CN, Doucet ME. Morphology and  
556 DNA sequence data reveal the presence of *Globodera ellingtonae* in the Andean region.  
557 *Contrib to Zool.* 2014;83: 227–243. doi:10.1163/18759866-08304002
- 558 10. Subbotin SA, Vierstraete A, De Ley P, Rowe J, Waeyenberge L, Moens M, et al.  
559 Phylogenetic relationships within the cyst-forming nematodes (Nematoda, Heteroderidae)

- 560 based on analysis of sequences from the ITS regions of ribosomal DNA. *Mol Phylogenet*  
561 *Evol.* 2001;21: 1–16. doi:10.1006/mpev.2001.0998
- 562 11. Blaxter ML, De Ley P, Garey JR, Llu LX, Scheldeman P, Vierstraete A, et al. A  
563 molecular evolutionary framework for the phylum Nematoda. *Nature.* 1998;392: 71–75.  
564 doi:10.1038/32160
- 565 12. Subbotin SA, Prado Vera IC Del, Mundo-Ocampo M, Baldwin JG. Identification,  
566 phylogeny and phylogeography of circumfenestrate cyst nematodes (Nematoda:  
567 Heteroderidae) as inferred from analysis of ITS-rDNA. *Nematology.* Nematoda; 2011. pp.  
568 805–824. doi:10.1163/138855410X552661
- 569 13. Gutiérrez-Gutiérrez C, Cantalapedra-Navarrete C, Montes-Borrego M, Palomares-Rius  
570 JE, Castillo P. Molecular phylogeny of the nematode genus *Longidorus* (Nematoda:  
571 Longidoridae) with description of three new species. *Zool J Linn Soc.* 2013;167: 473–500.  
572 doi:10.1111/zoj.12019
- 573 14. Ye W, Zeng Y, Kerns J. Molecular characterisation and diagnosis of root-knot nematodes  
574 (*Meloidogyne* spp.) from turfgrasses in North Carolina, USA. *PLoS One.* 2015;10:  
575 143556. doi:10.1371/journal.pone.0143556
- 576 15. Archidona-Yuste A, Cantalapedra-Navarrete C, Liébanas G, Rapoport HF, Castillo P,  
577 Palomares-Rius JE. Diversity of root-knot nematodes of the genus *Meloidogyne* Gøeldi,  
578 1892 (Nematoda: Meloidogynidae) associated with olive plants and environmental cues  
579 regarding their distribution in southern Spain. *PLoS One.* 2019;13: 198236.  
580 doi:10.1371/journal.pone.0198236
- 581 16. Madani M, Subbotin SA, Ward LJ, Li X, De Boer SH. Molecular characterization of  
582 canadian populations of potato cyst nematodes, *globovera rostochiensis* and *G. pallida*  
583 using ribosomal nuclear RNA and cytochrome B genes. *Can J Plant Pathol.* 2010;32: 252–  
584 263. doi:10.1080/07060661003740033
- 585 17. Skantar AM, Handoo ZA, Zasada IA, Ingham RE, Carta LK, Chitwood DJ.  
586 Morphological and molecular characterization of *globovera* populations from oregon and  
587 idaho. *Phytopathology.* 2011;101: 480–491. doi:10.1094/PHYTO-01-10-0010
- 588 18. Li X, Maria M, Cai R, Barsalote EM, Peneva V, Zheng J. Distribution of trichodorid  
589 species in mainland China with description of *Trichodorus hangzhouensis* sp. nov.  
590 (Nematoda, Triplonchida). *Zookeys.* 2020;945: 163–189.  
591 doi:10.3897/zookeys.945.50424.suppl1
- 592 19. Subbotin SA, Halford PD, Warry A, Perry RN. Variations in ribosomal DNA sequences  
593 and phylogeny of *Globovera* parasitising solanaceous plants. *Nematology.* 2000;2: 591–  
594 604. doi:10.1163/156854100509484
- 595 20. Grenier E, Bossis M, Fouville D, Renault L, Mugniéry D. Molecular approaches to the  
596 taxonomic position of Peruvian potato cyst nematodes and gene pool similarities in  
597 indigenous and imported populations of *Globovera*. *Heredity (Edinb).* 2001;86: 277–290.  
598 doi:10.1046/j.1365-2540.2001.00826.x
- 599 21. Bulman SR, Marshall JW. Differentiation of Australasian potato cyst nematode (PCN)  
600 populations using the polymerase chain reaction (PCR). *New Zeal J Crop Horti Sci.*  
601 1997;25: 123–129. doi:10.1080/01140671.1997.9513998
- 602 22. Grenier E, Fournet S, Petit E, Anthoine G. A cyst nematode “species factory” called the  
603 Andes. *Nematology.* 2010;12: 163–169. doi:10.1163/138855409X12573393054942
- 604 23. Baeza CA. El nematodo dorado (*Heterodera rostochiensis* Wol) en Colombia. ICA Ibagué,  
605 segunda reunión de Fitopatología y Sanidad Vegetal. 1972. p. 20.

- 606 24. Nieto, L., Varón, F., & Dees J. Reconocimiento y distribución del nemátodo quiste de la  
607 papa, *Globodera pallida* Stone, en Colombia. Rev ICA Colomb. 1983;18: 87–94.
- 608 25. Arciniegas N, Caicedo R, Árevalo E. Nematodo dorado. Rev papa. 2012; 33–36.
- 609 26. AGRONET. Red de información y comunicación del sector Agropecuario Colombiano.  
610 Anuario estadístico del sector agropecuario. 2020. Available: <http://www.agronet.gov.co>
- 611 27. Fenwick DW. Methods for the recovery and counting of cysts of heterodera schachtii from  
612 soil. J Helminthol. 1940;18: 155–172. doi:10.1017/S0022149X00031485
- 613 28. Golden AM. Morphology and Identification of Cyst Nematodes. Lamberti F, Taylor CE,  
614 editors. Cyst Nematodes. New York: Plenum Press; 1986. doi:10.1007/978-1-4613-2251-  
615 1\_2
- 616 29. Huijsman CA. Veredeling van de aardappel op resistentie tegen *Heterodera rostochiensis*  
617 Wollenweber. Veenman. 1957.
- 618 30. Ferris, V.R.; Ferris, J.M.; Faghihi J. Variation in spacer ribosomal DNA in some cyst-  
619 forming species of plant parasitic nematodes. Fundam Appl Nematol. 1993;16: 177–184.
- 620 31. Vrain T, Wakarchuk D, Levesque A, Hamilton R. Intraspecific rDNA restriction fragment  
621 length polymorphism in the *Xiphinema americanum* group. Fundam Appl Nematol.  
622 1992;15: 563–573.
- 623 32. Nunn GB. Nematode molecular evolution: an investigation of evolutionary patterns  
624 among nematodes based upon DNA sequences. University of Nottingham. 1992.
- 625 33. Quader M, Nambiar L, Cunnington J. Conventional and real-time PCR-based species  
626 identification and diversity of potato cyst nematodes (*Globodera* spp.) from Victoria,  
627 Australia. Nematology. 2008;10: 471–478. doi:10.1163/156854108784513860
- 628 34. Pylypenko LA, Uehara T, Phillips MS, Sigareva DD, Blok VC. Identification of  
629 *Globodera rostochiensis* and *G. pallida* in the Ukraine by PCR. Eur J Plant Pathol.  
630 2005;111: 39–46. doi:10.1007/s10658-004-2732-9
- 631 35. Riepsamen AH, Blok VC, Phillips M, Gibson T, Dowton M. Poly(T) variation within  
632 mitochondrial protein-coding genes in *Globodera* (Nematoda: Heteroderidae). J Mol Evol.  
633 2008;66: 197–209. doi:10.1007/s00239-007-9064-2
- 634 36. Ferris VR, Miller LI, Faghihi J, Ferris JM. Ribosomal DNA comparisons of *globodera*  
635 from two continents. J Nematol. 1995;27: 273–27383.
- 636 37. Szalanski AL, Sui DD, Harris TS, Powers TO. Identification of cyst nematodes of  
637 agronomic and regulatory concern with PCR-RFLP of ITS1. J Nematol. 1997;29: 255–  
638 267.
- 639 38. Blok VC, Malloch G, Harrower B, Phillips MS, Vrain TC. Intraspecific variation in  
640 Ribosomal DNA in populations of the potato cyst nematode *Globodera pallida*. J Nematol.  
641 1998;30: 262–274.
- 642 39. Širca S, Urek G. Morphometrical and ribosomal DNA sequence analysis of *Globodera*  
643 *rostochiensis* and *Globodera achilleae* from Slovenia. Russ J Nematol. 2004;12: 161–168.
- 644 40. Uehara T, Kushida A, Itou K, Narabu T, Momota Y. Discrimination of three cyst-forming  
645 nematodes of the genus *Globodera* (Nematode: Heteroderidae) from Japan based on PCR-  
646 RFLP of ribosomal DNA. Appl Entomol Zool. 2005;40: 537–543.  
647 doi:10.1303/aez.2005.537
- 648 41. Knoetze R, Malan AP, Mouton C. Differentiation of South African potato cyst nematodes  
649 ( PCN ) by analysis of the rDNA internal transcribed spacer region. African Plant  
650 Protection. African Plant; 2006. Available:  
651 [http://search.sabinet.co.za.ez.sun.ac.za/WebZ/images/ejour/plantpro/plantpro\\_v12\\_a11.pdf](http://search.sabinet.co.za.ez.sun.ac.za/WebZ/images/ejour/plantpro/plantpro_v12_a11.pdf)

- 652 f?sessionid=01-45646-708396483&format=F
- 653 42. Plantard O, Picard D, Valette S, Scurrah M, Grenier E, Mugniéry D. Origin and genetic  
654 diversity of Western European populations of the potato cyst nematode (*Globodera*  
655 *pallida*) inferred from mitochondrial sequences and microsatellite loci. *Mol Ecol*. 2008;17:  
656 2208–2218. doi:10.1111/j.1365-294X.2008.03718.x
- 657 43. Thompson JD, Gibson TJ, Plewniak F, Jeanmougin F, Higgins DG. The ClustalX  
658 windows interface: flexible strategies for multiple sequence alignment aided by.
- 659 44. Nicholas KB, Nicholas HBJ. GeneDoc: a tool for editing and annotating multiple  
660 sequence alignments. 1997. Distrib by author. 1997;4: 14.
- 661 45. Castresana J. Selection of conserved blocks from multiple alignments for their use in  
662 phylogenetic analysis. *Mol Biol Evol*. 2000;17: 540–552.  
663 doi:10.1093/oxfordjournals.molbev.a026334
- 664 46. Lanfear R, Frandsen PB, Wright AM, Senfeld T, Calcott B. Partitionfinder 2: New  
665 methods for selecting partitioned models of evolution for molecular and morphological  
666 phylogenetic analyses. *Mol Biol Evol*. 2017;34: 772–773. doi:10.1093/molbev/msw260
- 667 47. Hasegawa M, Kishino H, Yano T aki. Dating of the human-ape splitting by a molecular  
668 clock of mitochondrial DNA. *J Mol Evol*. 1985;22: 160–174. doi:10.1007/BF02101694
- 669 48. Kimura M. A simple method for estimating evolutionary rates of base substitutions  
670 through comparative studies of nucleotide sequences. *J Mol Evol*. 1980;16: 111–120.  
671 doi:10.1007/BF01731581
- 672 49. Ronquist F, Huelsenbeck JP. MrBayes 3: Bayesian phylogenetic inference under mixed  
673 models. *Bioinformatics*. 2003;19: 1572–1574. doi:10.1093/bioinformatics/btg180
- 674 50. Alfaro ME, Zoller S, Lutzoni F. Bayes or bootstrap? A simulation study comparing the  
675 performance of Bayesian Markov chain Monte Carlo sampling and bootstrapping in  
676 assessing phylogenetic confidence. *Mol Biol Evol*. 2003;20: 255–266.  
677 doi:10.1093/molbev/msg028
- 678 51. Zwickl DJ. Genetic algorithm approaches for the phylogenetic analysis of large biological  
679 sequence datasets under the maximum likelihood criterion. *Philosophy*. 2006. p. 115.  
680 doi:(<http://www.zo.utexas.edu/faculty/antisense/garli/Garli.html>)
- 681 52. Sukumaran J, Holder MT. DendroPy: A Python library for phylogenetic computing.  
682 *Bioinformatics*. 2010;26: 1569–1571. doi:10.1093/bioinformatics/btq228
- 683 53. Rozas J, Sánchez-DelBarrio JC, Messeguer X, Rozas R. DnaSP, DNA polymorphism  
684 analyses by the coalescent and other methods. *Bioinformatics*. 2003;19: 2496–2497.  
685 doi:10.1093/bioinformatics/btg359
- 686 54. Dandurand LM, Zasada IA, Wang X, Mimee B, De Jong W, Novy R, et al. Current Status  
687 of Potato Cyst Nematodes in North America. *Annu Rev Phytopathol*. 2019;57: 117–133.  
688 doi:10.1146/annurev-phyto-082718-100254
- 689 55. Lucero AM, Peña LA, Cultid L, Bolaños MA. Manejo integrado de chisas en fincas de  
690 minifundio del departamento de Nariño (Colombia). *Corpoica Cienc y Tecnol Agropecu*.  
691 2006;7: 70. doi:10.21930/rcta.vol7\_num1\_art:63
- 692 56. Ye W, Robbins RT. Stepwise and canonical discriminant analysis of *Longidorus* species  
693 (*Nematoda: Longidoridae*) from Arkansas. *J Nematol*. 2004;36: 449–456.
- 694 57. Humphreys-Pereira DA, Williamson VM, Coyne DL, Salazar L, Gómez-Alpizar L, Lee S.  
695 Molecular and morphological characterisation of *Scutellonema bradys* from yam in Costa  
696 Rica and development of specific primers for its detection. *Nematology*. 2014;16: 137–  
697 147. doi:10.1163/15685411-00002752



- 698 58. Tiroesele B, Skoda SR, Hunt TE, Lee DJ, Ullah MI, Molina-Ochoa J, et al. Morphological  
699 and genetic analysis of four color morphs of bean leaf beetle. *J Insect Sci.* 2018;18: 39.  
700 doi:10.1093/jisesa/iey016
- 701 59. Dashinov D, Czerniejewski P, Balshine S, Synyshyn C, Tasheva-Terzieva E, Stefanov T,  
702 et al. Variation in external morphology between the native and invasive populations of the  
703 round goby, *Neogobius melanostomus* (Actinopterygii: Gobiidae). *Zoomorphology.*  
704 2020;139: 361–371. doi:10.1007/s00435-020-00480-7
- 705 60. Thiéry M, Fouville D, Mugniéry D. Intra- and interspecific variability in Globodera,  
706 parasites of Solanaceous plants, revealed by Random Amplified Polymorphic DNA  
707 (RAPD) and correlation with biological features. *Fundam Appl Nematol.* 1997;20: 495–  
708 504.  
709

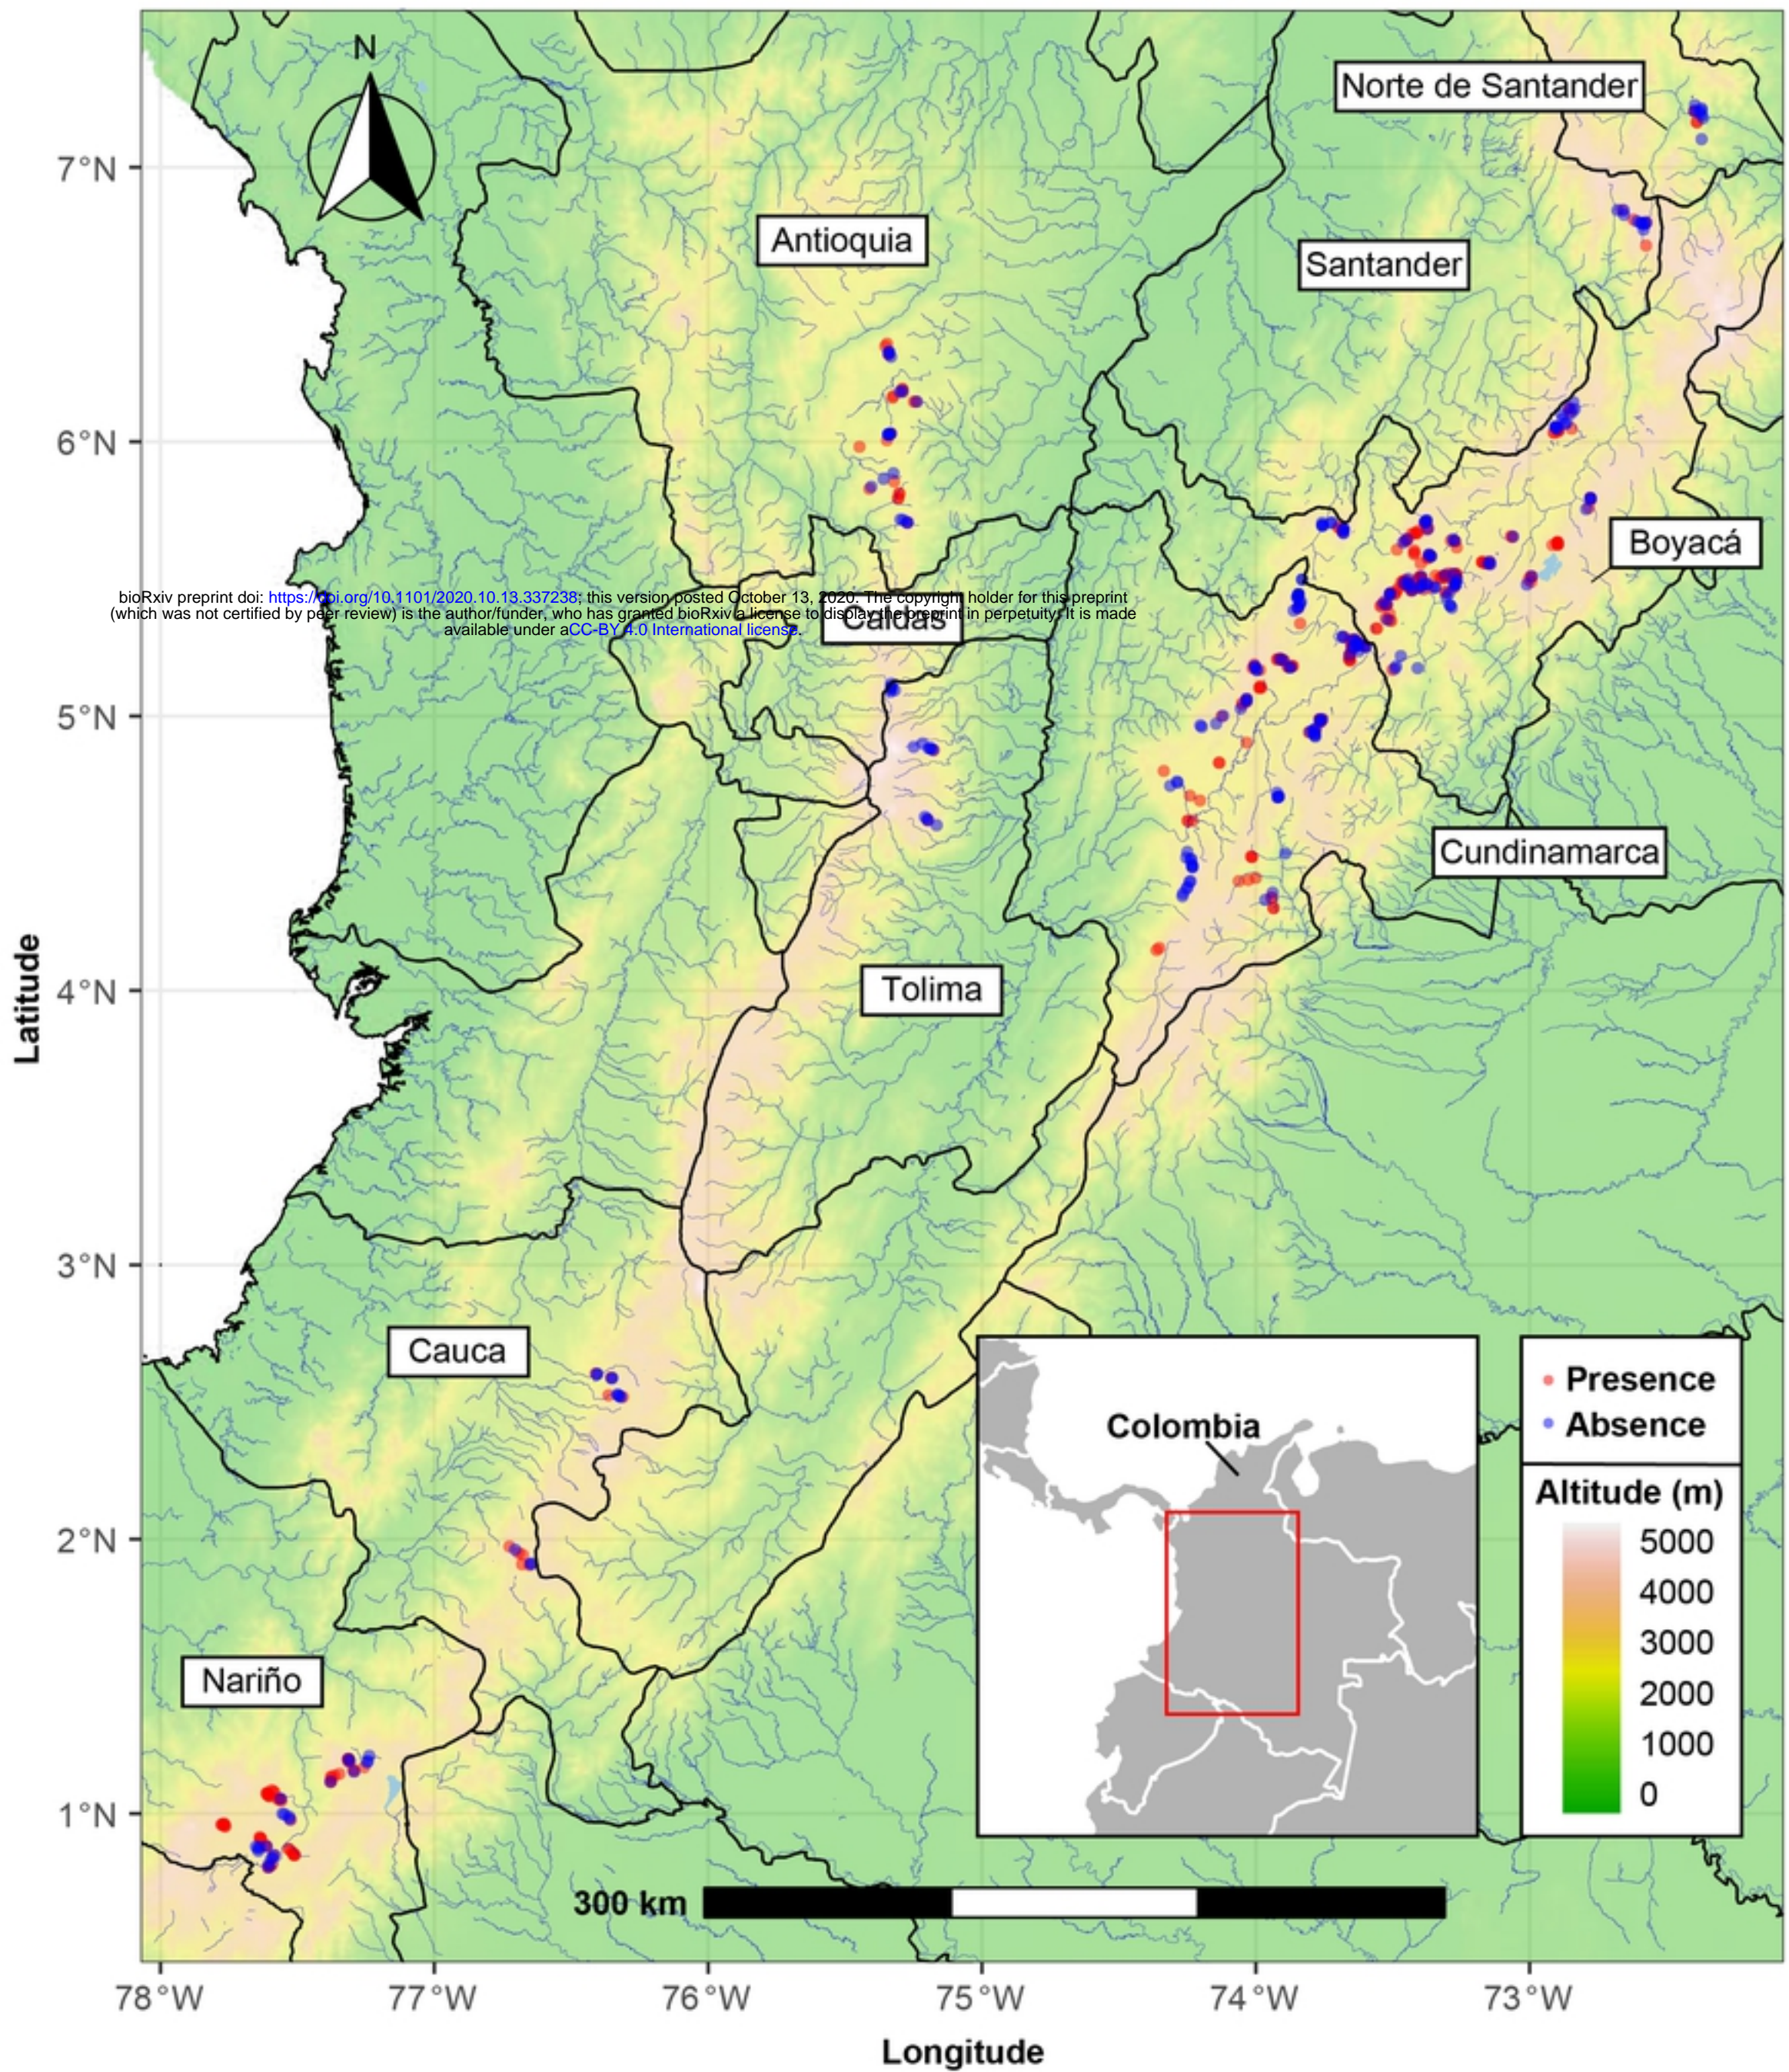

Figure 1

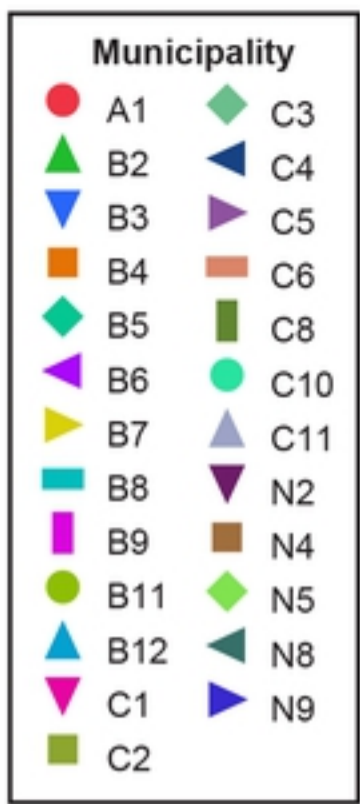

bioRxiv preprint doi: <https://doi.org/10.1101/2020.10.13.337238>; this version posted October 13, 2020. The copyright holder for this preprint (which was not certified by peer review) is the author/funder, who has granted bioRxiv a license to display the preprint in perpetuity. It is made available under aCC-BY 4.0 International license.

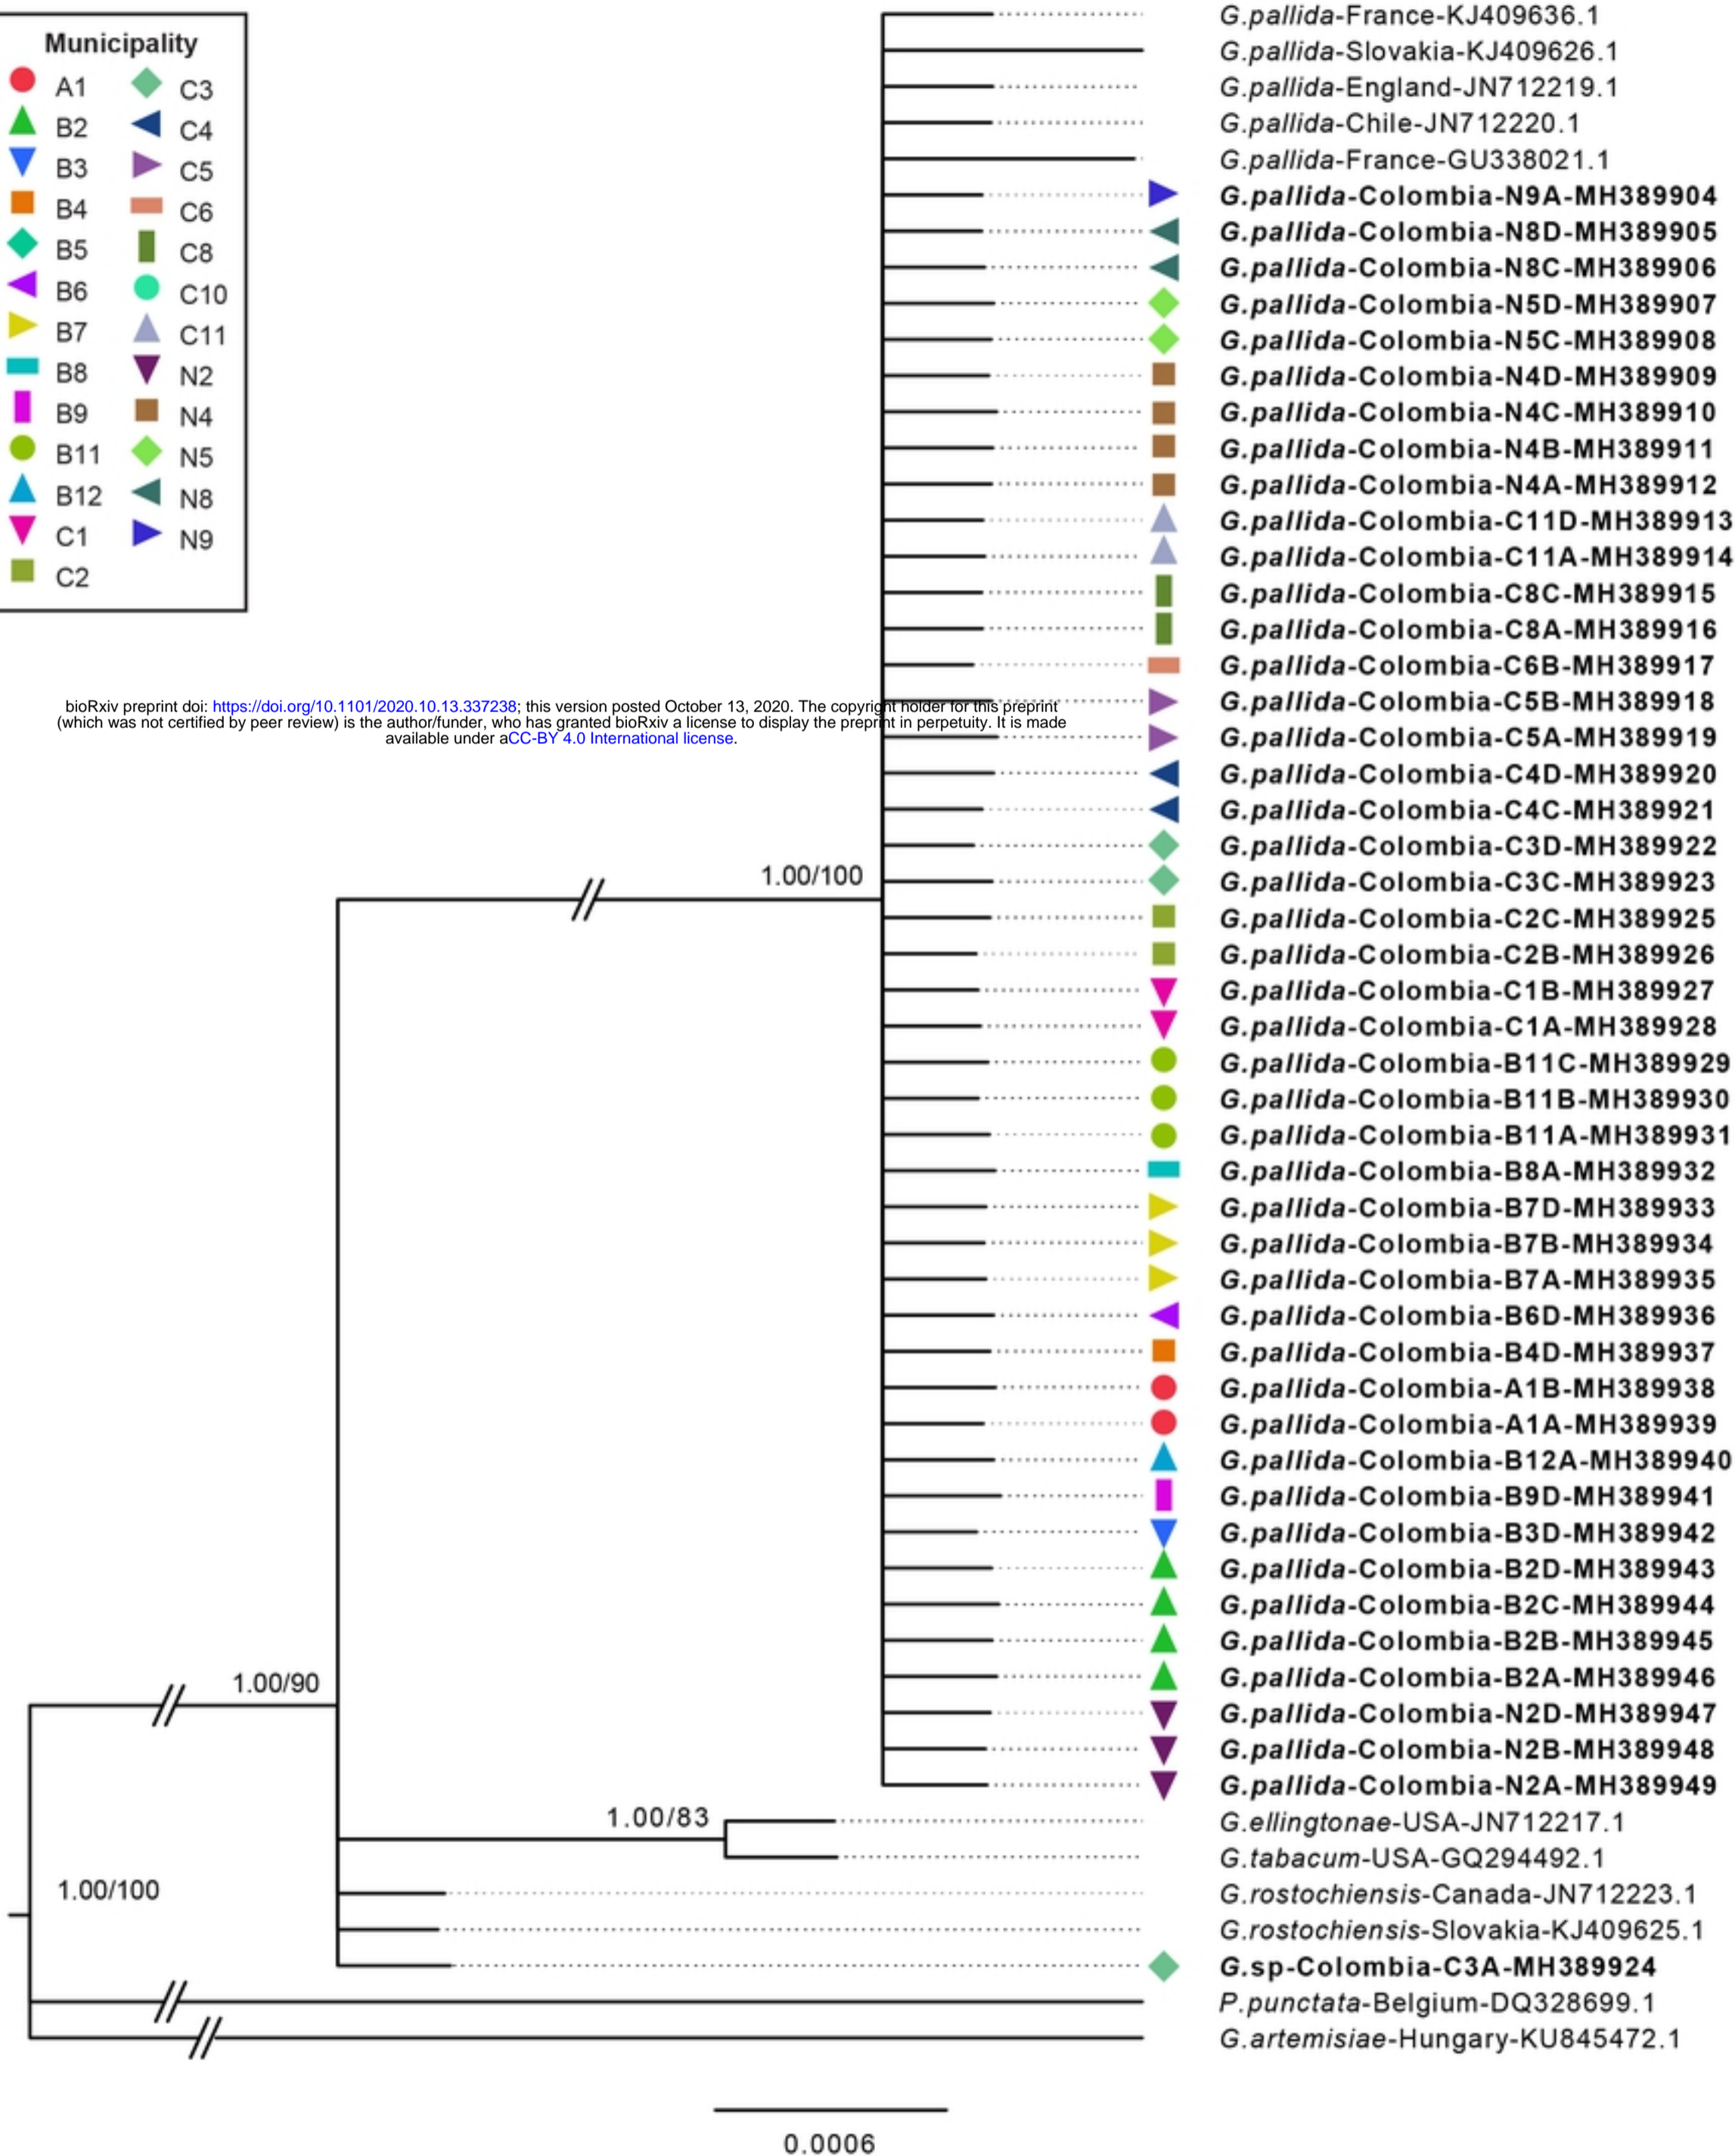

Figure 2

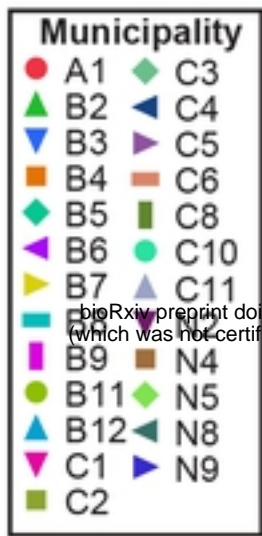

bioRxiv preprint doi: <https://doi.org/10.1101/2020.10.13.337238>; this version posted October 13, 2020. The copyright holder for this preprint (which was not certified by peer review) is the author/funder, who has granted bioRxiv a license to display the preprint in perpetuity. It is made available under aCC-BY 4.0 International license.

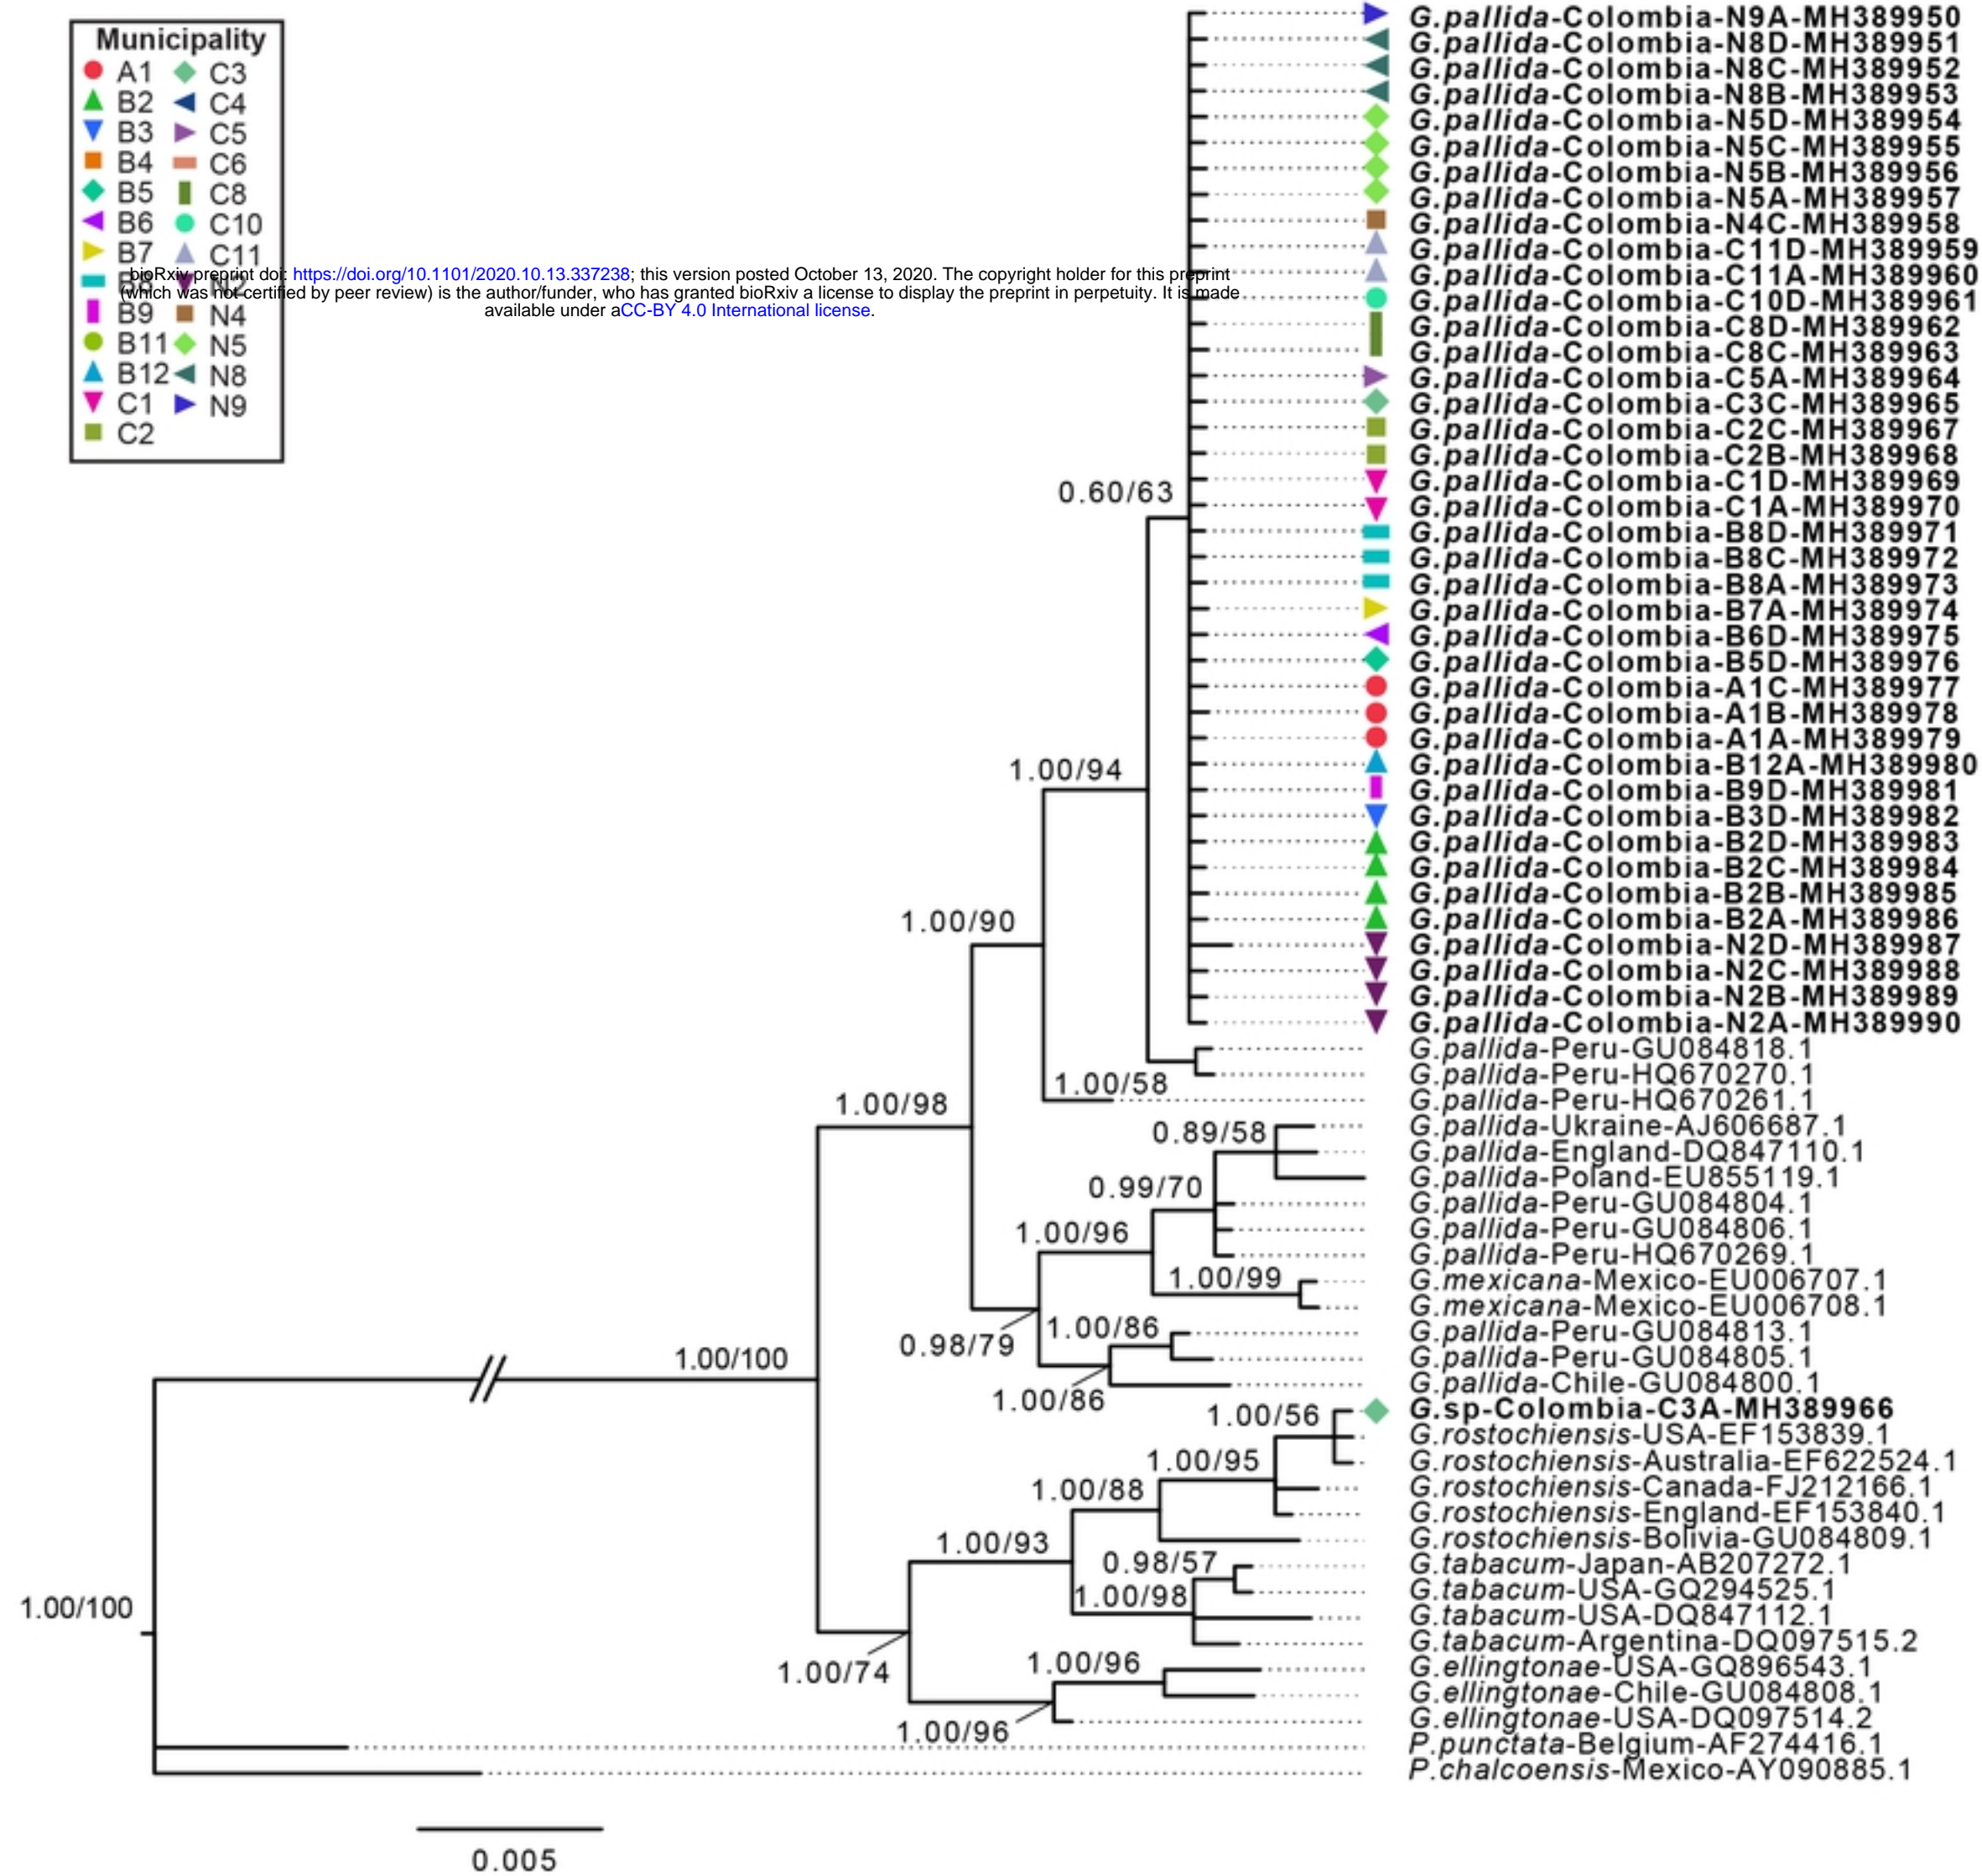

Figure 3

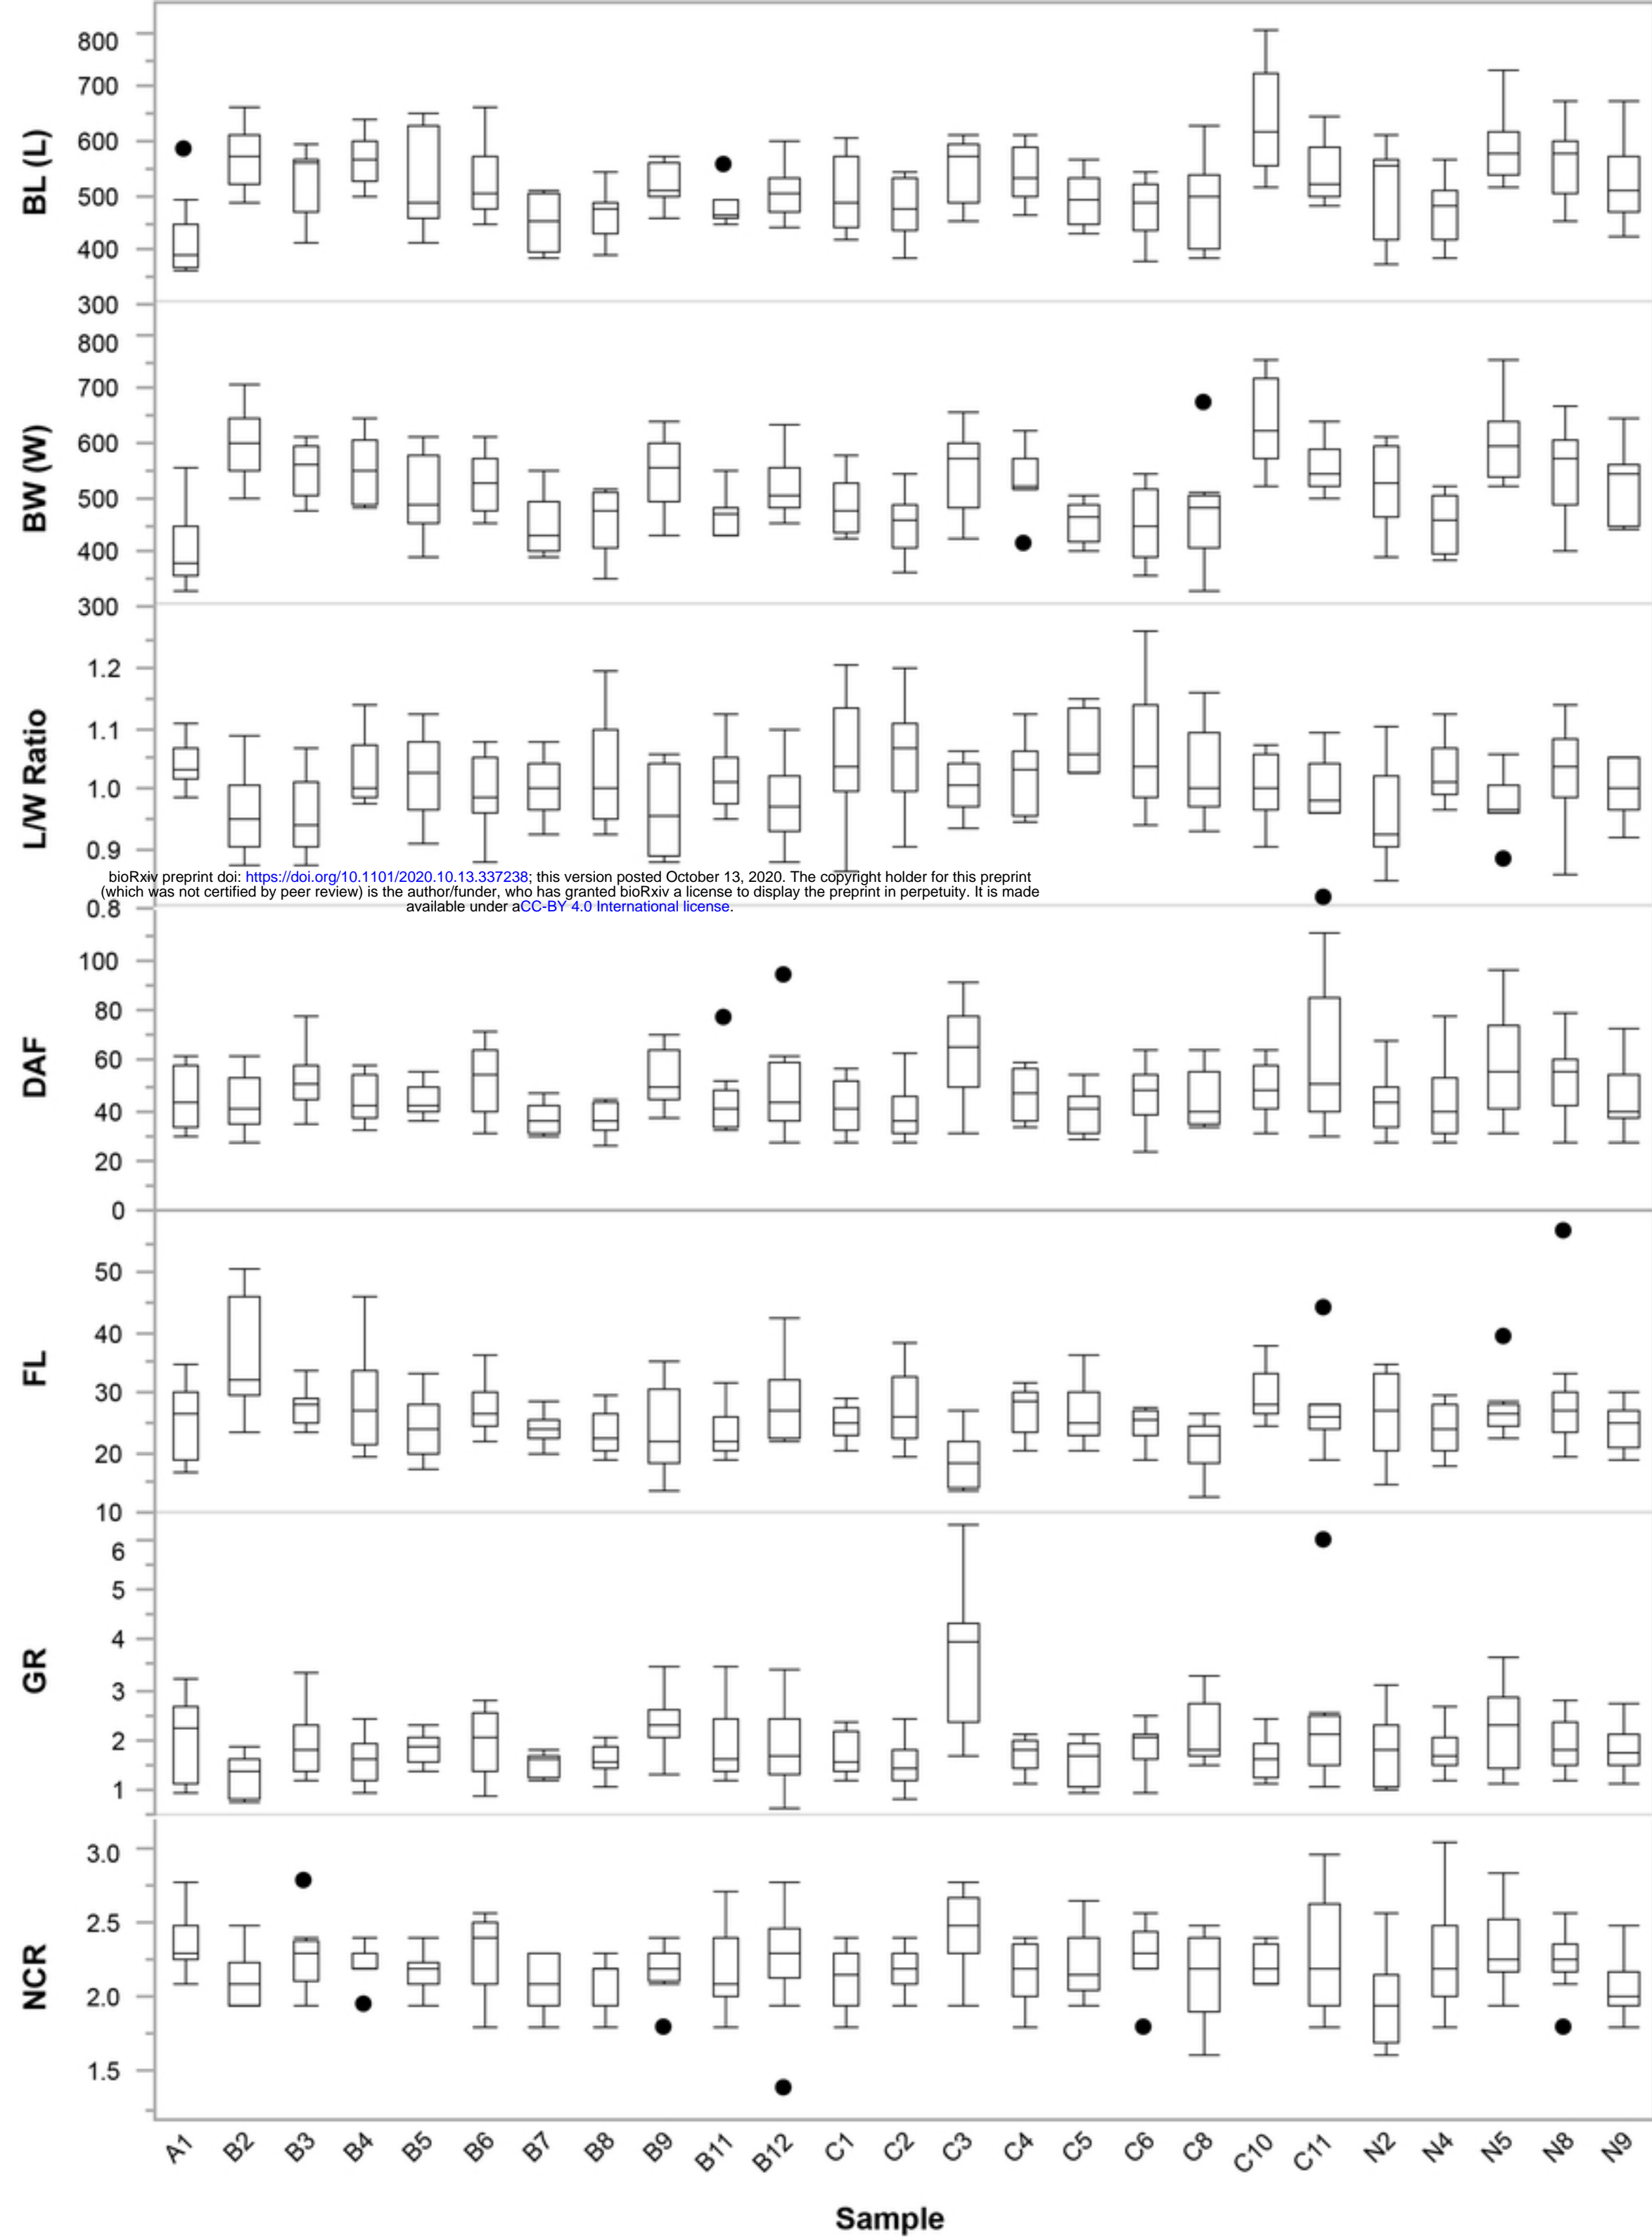

Figure 4

bioRxiv preprint doi: <https://doi.org/10.1101/2020.10.13.337238>; this version posted October 13, 2020. The copyright holder for this preprint (which was not certified by peer review) is the author/funder, who has granted bioRxiv a license to display the preprint in perpetuity. It is made available under aCC-BY 4.0 International license.

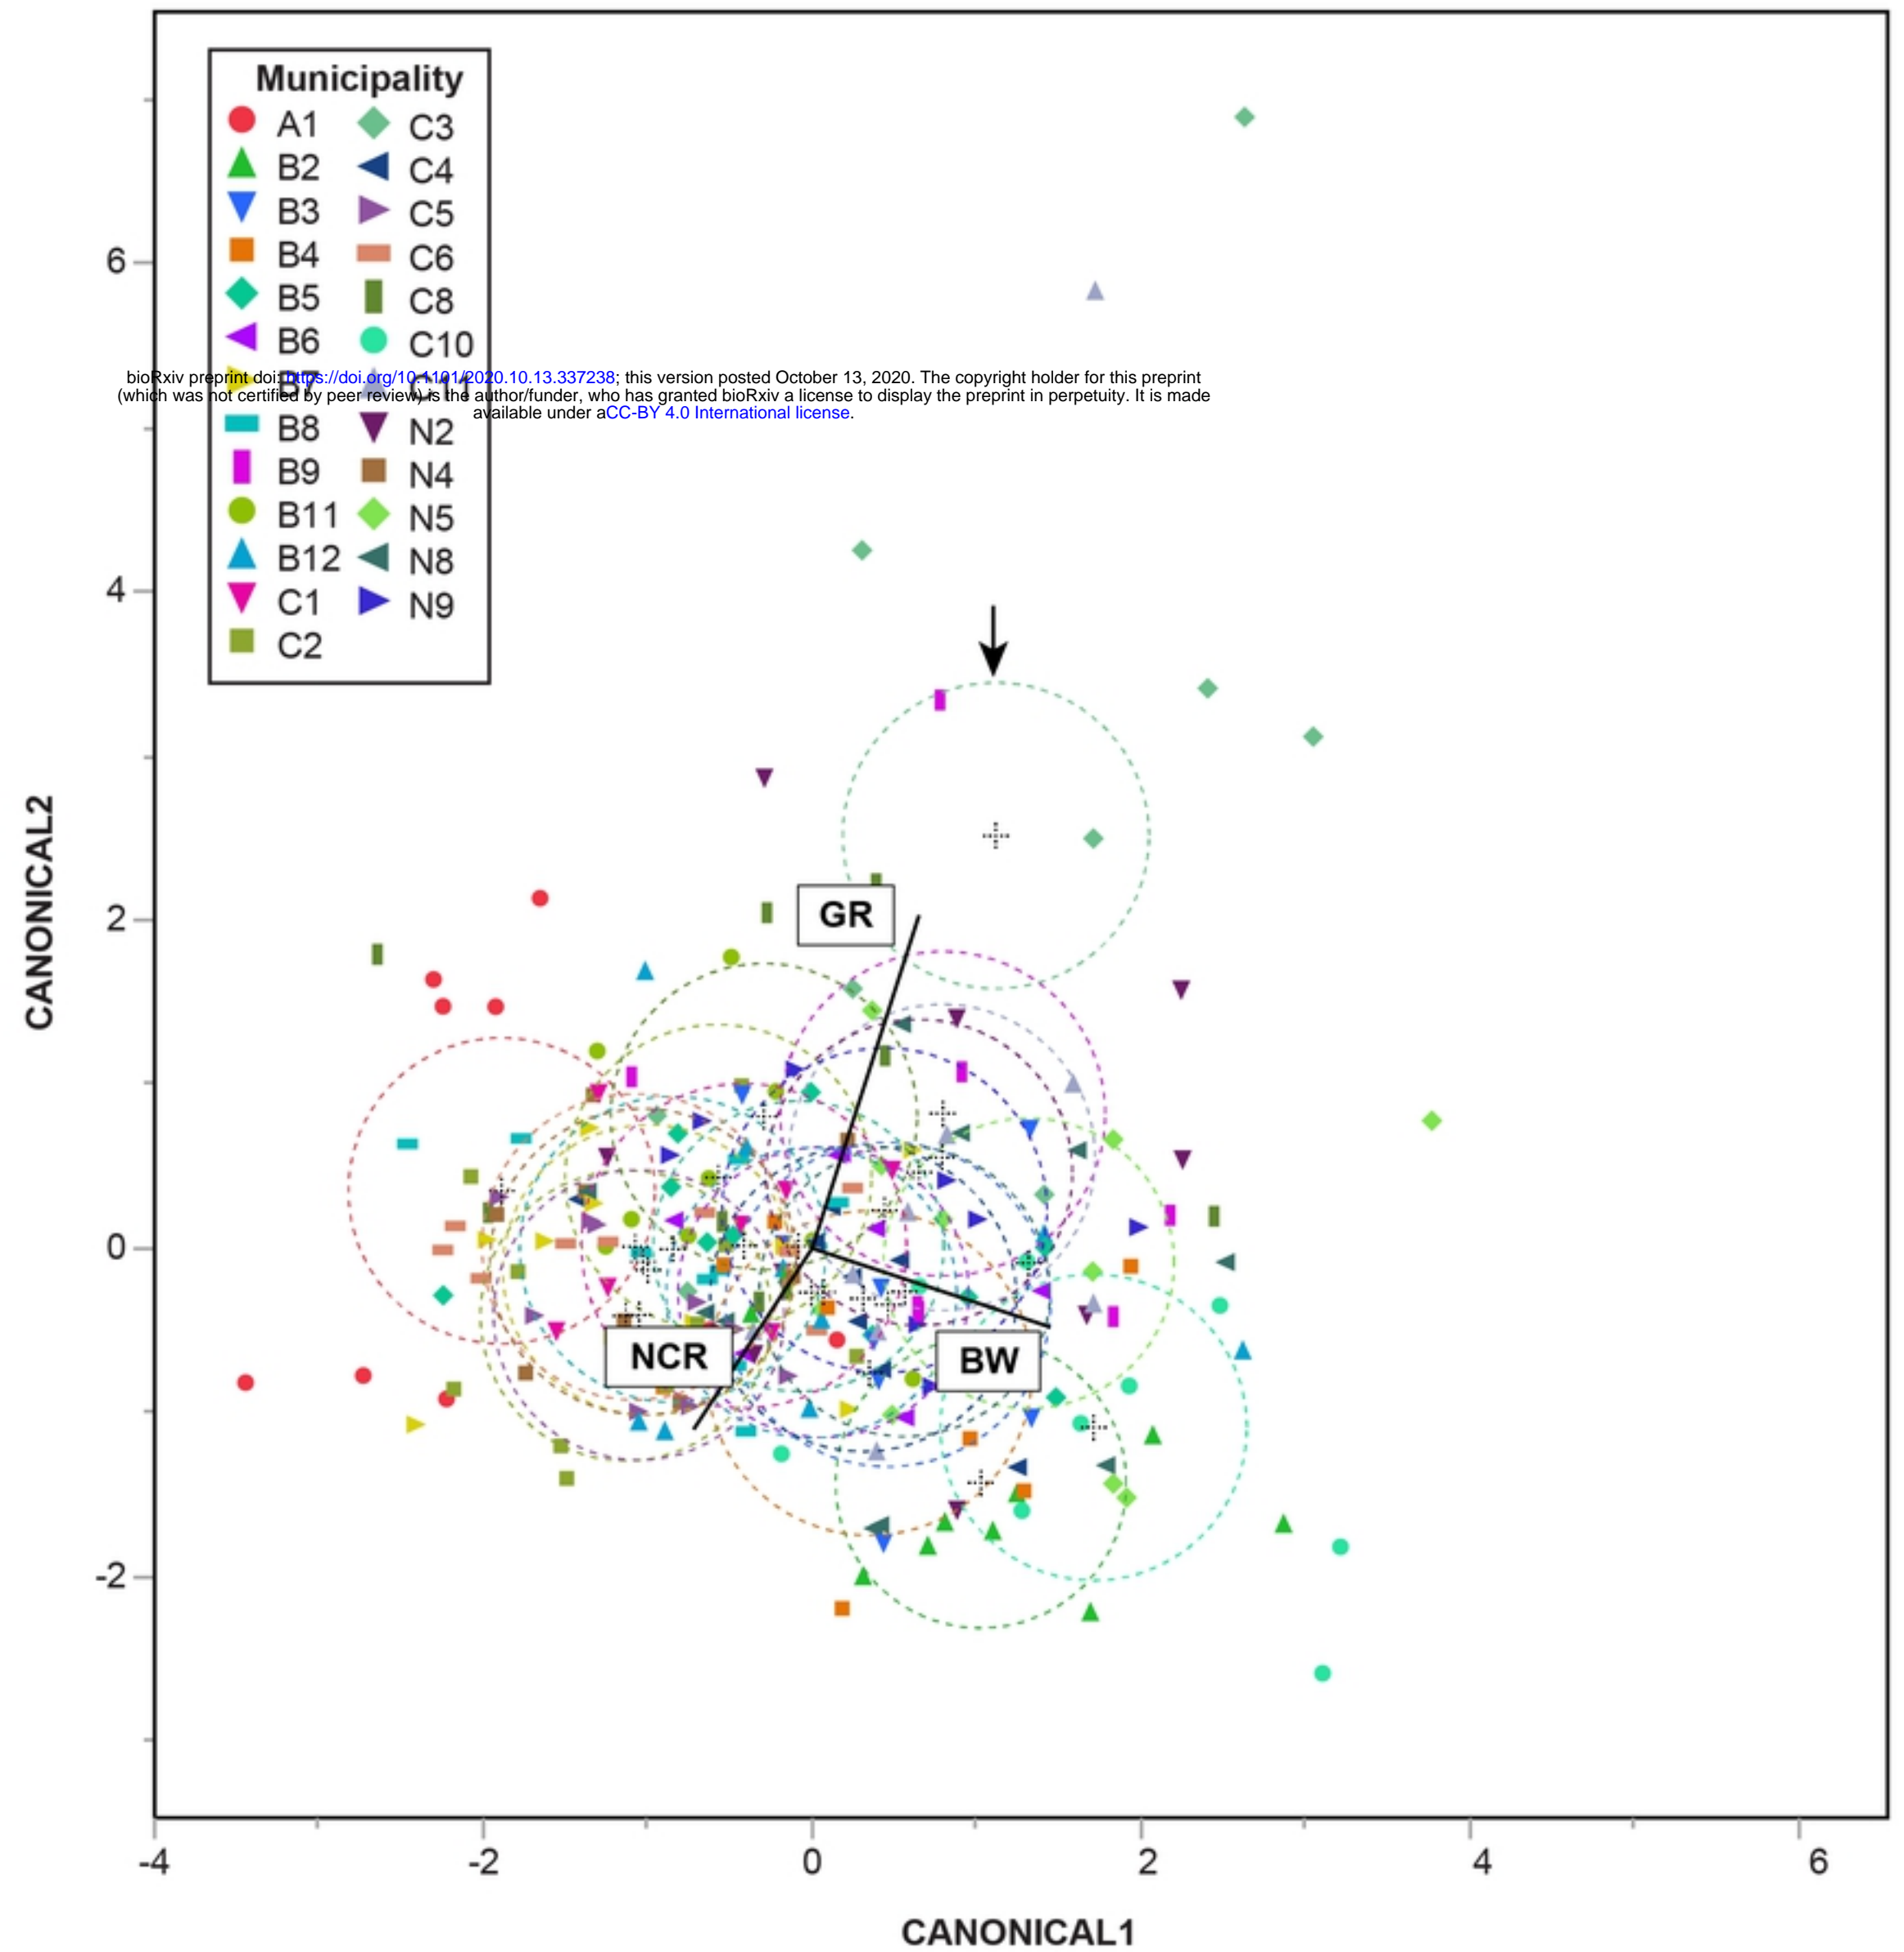

Figure 5
